## 1 Conservation of copy number profiles during engraftment and passaging of 2 patient-derived cancer xenografts

3  
4 Xing Yi Woo<sup>1,a,#,§</sup>, Jessica Giordano<sup>2,3,b,#</sup>, Anuj Srivastava<sup>1,a</sup>, Zi-Ming Zhao<sup>1,a</sup>, Michael W. Lloyd<sup>4,a</sup>,  
5 Roebi de Bruijn<sup>5,b</sup>, Yun-Suhk Suh<sup>6</sup>, Rajesh Patidar<sup>7,a</sup>, Li Chen<sup>7,a</sup>, Sandra Scherer<sup>8,a</sup>, Matthew  
6 Bailey<sup>8,9,a</sup>, Chieh-Hsiang Yang<sup>8,a</sup>, Emilio Cortes-Sanchez<sup>8,a</sup>, Yuanxin Xi<sup>10,a</sup>, Jing Wang<sup>10,a</sup>,  
7 Jayamanna Wickramasinghe<sup>11,a</sup>, Andrew V. Kossenkov<sup>11,a</sup>, Vito Rebecca<sup>11,a</sup>, Hua Sun<sup>12,a</sup>, R. Jay  
8 Mashl<sup>12,a</sup>, Sherri Davies<sup>12,a</sup>, Ryan Jeon<sup>13,a</sup>, Christian Frech<sup>13,a</sup>, Jelena Randjelovic<sup>13,a</sup>, Jacqueline  
9 Rosains<sup>13,a</sup>, Francesco Galimi<sup>2,3,b</sup>, Andrea Bertotti<sup>2,3,b</sup>, Adam Lafferty<sup>14,b</sup>, Alice C. O'Farrell<sup>14,b</sup>,  
10 Elodie Modave<sup>15,16</sup>, Diether Lambrechts<sup>15,16</sup>, Petra ter Brugge<sup>5,b</sup>, Violeta Serra<sup>17,b</sup>, Elisabetta  
11 Marangoni<sup>18,b</sup>, Rania El Botty<sup>18,b</sup>, Hyunsoo Kim<sup>1</sup>, Jong-Il Kim<sup>6</sup>, Han-Kwang Yang<sup>6</sup>, Charles Lee<sup>1</sup>,  
12 Dennis A. Dean, II<sup>12,a</sup>, Brandi Davis-Dusenbery<sup>12,a</sup>, Yvonne A. Evrard<sup>7,a</sup>, James H. Doroshov<sup>19</sup>,  
13 Alana L. Welm<sup>8,a</sup>, Bryan E. Welm<sup>8,a</sup>, Michael T. Lewis<sup>20,a</sup>, Bingliang Fang<sup>10,a</sup>, Jack A. Roth<sup>10,a</sup>,  
14 Funda Meric-Bernstam<sup>10,a</sup>, Meenhard Herlyn<sup>11,a</sup>, Michael Davies<sup>10,a</sup>, Li Ding<sup>12,a</sup>, Shunqiang Li<sup>12,a</sup>,  
15 Ramaswamy Govindan<sup>12,a</sup>, Claudio Isella<sup>2,3,b,§</sup>, Jeffrey A. Moscow<sup>21,a,§</sup>, Livio Trusolino<sup>2,3,b,§</sup>,  
16 Annette T. Byrne<sup>14,b,§</sup>, Jos Jonkers<sup>5,b,§</sup>, Carol J. Bult<sup>4,a,§</sup>, Enzo Medico<sup>2,3,b,§,\*</sup>, Jeffrey H.  
17 Chuang<sup>1,a,§,\*</sup>, PDXNET consortium & EurOPDX consortium

18  
19 <sup>1</sup> The Jackson Laboratory for Genomic Medicine, Farmington, CT

20 <sup>2</sup> Department of Oncology, University of Torino, Candiolo, Italy

21 <sup>3</sup> Candiolo Cancer Institute, FPO-IRCCS, Candiolo, Italy

22 <sup>4</sup> The Jackson Laboratory, Bar Harbor, ME

23 <sup>5</sup> Netherlands Cancer Institute, Amsterdam, Netherlands

24 <sup>6</sup> College of Medicine, Seoul National University, South Korea

25 <sup>7</sup> Frederick National Laboratory for Cancer Research, Frederick, MD

26 <sup>8</sup> University of Utah Huntsman Cancer Institute, Salt Lake City, UT

27 <sup>9</sup> Department of Human Genetics, University of Utah, Salt Lake City, UT

28 <sup>10</sup> The University of Texas M.D. Anderson Cancer Center, Houston, TX

29 <sup>11</sup> The Wistar Institute, Philadelphia, PA

30 <sup>12</sup> Washington University School of Medicine in St. Louis, St. Louis, MO

31 <sup>13</sup> Seven Bridges Genomics, Inc., Cambridge, Charlestown, MA

32 <sup>14</sup> Department of Physiology and Medical Physics, Centre for Systems Medicine, Royal College  
33 of Surgeons in Ireland, Dublin, Ireland

34 <sup>15</sup> Center for Cancer Biology, VIB, Leuven, Belgium

35 <sup>16</sup> Laboratory of Translational Genetics, Department of Human Genetics, KU Leuven, Leuven,  
36 Belgium

37 <sup>17</sup> Vall d'Hebron Institute of Oncology, Barcelona, Spain

38 <sup>18</sup> Institut Curie, Paris, France

39 <sup>19</sup> Division of Cancer Treatment and Diagnosis, National Cancer Institute, Bethesda, MD

40 <sup>20</sup> Lester and Sue Smith Breast Center, Baylor College of Medicine, Houston, TX

41 <sup>21</sup> Investigational Drug Branch, National Cancer Institute, Bethesda, MD

42 <sup>a</sup> PDXNET consortium

43 <sup>b</sup> EurOPDX consortium

44 # These authors contributed equally to this work.

45 § These authors jointly supervised this work.

46 \* Correspondence should be addressed to E.M. ([enzo.medico@unito.it](mailto:enzo.medico@unito.it)) or J.H.C.  
47 ([jeff.chuang@jax.org](mailto:jeff.chuang@jax.org)).

48

#### 49 **PDXNET Consortium (additional members)**

50 Steven Neuhauser<sup>4</sup>, Javad Noorbakhsh<sup>1</sup>, Peter Robinson<sup>1</sup>, Tijana Borovski<sup>13</sup>, Vicki Chin<sup>13</sup>, John  
51 DiGiovanna<sup>13</sup>, Soner Koc<sup>13</sup>, Tamara Stankovic<sup>13</sup>, Tiffany Wallace<sup>22</sup>, Lacey E. Dobrolecki<sup>20</sup>, Argun  
52 Akcakanat<sup>10</sup>, Kurt Evans<sup>10</sup>, Don Gibbons<sup>10</sup>, Vanessa Jensen<sup>10</sup>, Dara Keener<sup>10</sup>, Michael Kim<sup>10</sup>,  
53 Scott Kopetz<sup>10</sup>, Mourad Majidi<sup>10</sup>, David Menter<sup>10</sup>, Coya Tapia<sup>10</sup>, Shannon Westin<sup>10</sup>, Timothy Yap<sup>10</sup>,  
54 Jianhua Zhang<sup>10</sup>, Ran Zhang<sup>10</sup>, Xiaoshan Zhang<sup>10</sup>, Min Jin Ha<sup>10</sup>, Huiqin Chen<sup>10</sup>, Dali Li<sup>10</sup>, Xiaofeng  
55 Zheng<sup>10</sup>, Erkan Yucan<sup>10</sup>, Christopher D Lanier<sup>10</sup>, Turcin Saridogan<sup>10</sup>, Bryce P Kirby<sup>10</sup>, Bingbing  
56 Dai<sup>10</sup>, Gao Boning<sup>23</sup>, John Minna<sup>23</sup>, Hyunsil Park<sup>23</sup>, Brenda Timmons<sup>23</sup>, Luc Girard<sup>23</sup>, Dylan  
57 Fingerman<sup>11</sup>, Qin Liu<sup>11</sup>, Rajasekharan Somasundaram<sup>11</sup>, Min Xiao<sup>11</sup>, Mike Tetzlaff<sup>10</sup>, Vashisht G.  
58 Yennu-Nanda<sup>10</sup>, Kate Nathanson<sup>24</sup>, George Xu<sup>25</sup>, Rebecca Aft<sup>12</sup>, Jessica Andrews<sup>12</sup>, Alicia  
59 Asaro<sup>12</sup>, Song Cao<sup>12</sup>, Feng Chen<sup>12</sup>, John DiPersio<sup>12</sup>, Erin Dreskell<sup>12</sup>, Ryan Fields<sup>12</sup>, Steven Foltz<sup>12</sup>,  
60 Katherine Fuh<sup>12</sup>, Kian Lim<sup>12</sup>, Jinqin Luo<sup>12</sup>, Cynthia Ma<sup>12</sup>, Mike McLellan<sup>12</sup>, Tina Primeau<sup>12</sup>,  
61 Fernanda Rodriguez<sup>12</sup>, Dawn Ross<sup>12</sup>, Roslynn Sims<sup>12</sup>, Brian VanTine<sup>12</sup>, Andrea Wang-Gillam<sup>12</sup>,  
62 Mike Wendl<sup>12</sup>, Cathy Wiggins<sup>12</sup>, Yige Wu<sup>12</sup>, Matt Wyczalkowski<sup>12</sup>, Lijun Yao<sup>12</sup>, Daniel Cui Zhou<sup>12</sup>,  
63 Chong-xian Pan<sup>26</sup>, Moon S. Chen, Jr<sup>26</sup>, Luis Carvajal-Carmona<sup>26</sup>, Matthew Ellis<sup>27</sup>, Michael  
64 Ittmann<sup>27</sup>, Susan Hilsenbeck<sup>27</sup>, Bert O'Malley<sup>27</sup>, Nicholas Mitsiades<sup>27</sup>, Salma Kaochar<sup>27</sup>

65

66 <sup>22</sup> Center to Reduce Cancer Health Disparities, National Cancer Institute, Bethesda, MD

67 <sup>23</sup> Hamon Center For Therapeutic Oncology, UT Southwestern Medical Center, Dallas

68 <sup>24</sup> Abramson Cancer Center, University of Pennsylvania, Philadelphia, PA

69 <sup>25</sup> Department of Pathology and Laboratory Medicine, Hospital of the University of  
70 Pennsylvania, Philadelphia, PA

71 <sup>26</sup> University of California Davis, Sacramento, CA

72 <sup>27</sup> Baylor College of Medicine, Houston, TX.

73

74 **EurOPDX Consortium (additional members)**

75 Simona Corso<sup>2,3</sup>, Alessandro Fiori<sup>2,3</sup>, Silvia Giordano<sup>2,3</sup>, Marieke van de Ven<sup>5</sup>, Daniel S. Peeper<sup>5</sup>,  
76 Ian Miller<sup>14</sup>, Cristina Bernadó<sup>17</sup>, Beatriz Morancho<sup>17</sup>, Lorena Ramírez<sup>17</sup>, Joaquín Arribas<sup>17</sup>, Héctor  
77 G. Palmer<sup>17</sup>, Alejandro Piris-Gimenez<sup>17</sup>, Laura Soucek<sup>17</sup>, Ahmed Dahmani<sup>18</sup>, Elodie Montaudon<sup>18</sup>,  
78 Fariba Nemati<sup>18</sup>, Virginie Dangles-Marie<sup>18</sup>, Didier Decaudin<sup>18</sup>, Sergio Roman-Roman<sup>18</sup>, Denis G.  
79 Alférez<sup>28</sup>, Katherine Spence<sup>28</sup>, Robert B. Clarke<sup>28</sup>, Mohamed Bentires-Alj<sup>29</sup>, David K.  
80 Chang<sup>30</sup>, Andrew V. Biankin<sup>30</sup>, Alejandra Bruna<sup>31</sup>, Steven Kupczak<sup>31</sup>, Martin O'Reilly<sup>31</sup>,  
81 Magdalena Ridley<sup>31</sup>, Carlos Caldas<sup>31</sup>, Oriol Casanovas<sup>32</sup>, Eva Gonzalez-Suarez<sup>32</sup>, Purificación  
82 Muñoz<sup>32</sup>, Alberto Villanueva<sup>32</sup>, Nathalie Conte<sup>33</sup>, Jeremy Mason<sup>33</sup>, Ross Thorne<sup>33</sup>, Terrence F.  
83 Meehan<sup>33</sup>, Zdenka Dudova<sup>34</sup>, Ales Křenek<sup>34</sup>, Alexandros Sigaras<sup>35</sup>, Olivier Elemento<sup>35</sup>, Giorgio  
84 Inghirami<sup>35</sup>, Anna Golebiewska<sup>36</sup>, Simone P. Niclou<sup>36</sup>, G. Bea A. Wisman<sup>37</sup>, Steven de Jong<sup>37</sup>,  
85 Petra Kralova<sup>38</sup>, Radislav Sedlacek<sup>38</sup>, Eleonora Leucci<sup>39</sup>, Luisa Lanfrancone<sup>40</sup>, Pier Giuseppe  
86 Pelicci<sup>40</sup>, Gunhild Mari Mælandsmo<sup>41</sup>, Jens Henrik Norum<sup>41</sup>, Emilie Vinolo<sup>42</sup>

87

88 <sup>28</sup> Manchester Cancer Research Centre, University of Manchester, UK

89 <sup>29</sup> University of Basel, University Hospital Basel, Switzerland

90 <sup>30</sup> University of Glasgow, Institute of Cancer Sciences, UK

91 <sup>31</sup> Cancer Research UK Cambridge Institute, Cambridge Cancer Centre, UK

92 <sup>32</sup> Catalan Institute of Oncology, Bellvitge Biomedical Research Institute, L'Hopistalet de  
93 Llobregat, Barcelona, Spain

94 <sup>33</sup> European Bioinformatics Institute, European Molecular Biology Laboratory, Wellcome Trust  
95 Genome Campus, Hinxton, Cambridge, UK

96 <sup>34</sup> Institute of Computer Science, Masaryk University, Brno, Czech Republic

97 <sup>35</sup> Cornell University, Weill Cornell Medical College, New York, NY, United States

98 <sup>36</sup> NorLux Neuro-Oncology Laboratory, Department of Oncology, Luxembourg Institute of  
99 Health, Luxembourg, Luxembourg

100 <sup>37</sup> University Medical Centre Groningen, Groningen, The Netherlands

101 <sup>38</sup> Czech Center for Phenogenomics, Institute of Molecular Genetics, Vestec, Czech Republic

102 <sup>39</sup> TRACE PDX platform, Katholieke Universiteit Leuven, Leuven, Belgium

103 <sup>40</sup> European Institute of Oncology, Milan, Italy

104 <sup>41</sup> Oslo University Hospital, Oslo, Norway

105 <sup>42</sup> seeding science SPRL, Limelette, Belgium

106

## 107 **ABSTRACT**

108 Patient-derived xenografts (PDXs) are resected human tumors engrafted into mice for preclinical  
109 studies and therapeutic testing. It has been proposed that the mouse host affects tumor evolution  
110 during PDX engraftment and propagation, impacting the accuracy of PDX modeling of human  
111 cancer. Here we exhaustively analyze copy number alterations (CNAs) in 1451 PDX and matched  
112 patient tumor (PT) samples from 509 PDX models. CNA inferences based on DNA sequencing  
113 and microarray data displayed substantially higher resolution and dynamic range than gene  
114 expression-based inferences, and they also showed strong CNA conservation from PTs through  
115 late-passage PDXs. CNA recurrence analysis of 130 colorectal and breast PT/PDX-early/PDX-  
116 late trios confirmed high-resolution CNA retention. We observed no significant enrichment of  
117 cancer-related genes in PDX-specific CNAs across models. Moreover, CNA differences between  
118 patient and PDX tumors were comparable to variations in multi-region samples within patients.  
119 Our study demonstrates the lack of systematic copy number evolution driven by the PDX mouse  
120 host.

121

## 122 **MAIN**

123 A variety of models of human cancer have been used to study basic biological processes and  
124 predict responses to treatment. For example, mouse models with genetically engineered  
125 mutations in oncogenes and tumor suppressor genes have clarified the genetic and molecular  
126 basis of tumor initiation and progression<sup>1,2</sup>, though responses sometimes differ between human  
127 and mouse<sup>3</sup>. Cell lines have also been widely used to study cancer cells, but they lack the  
128 heterogeneity and microenvironment of *in vivo* tumors and have shown limitations for predicting  
129 clinical response<sup>4</sup>. Human tumors engrafted into transplant-compliant recipient mice (patient-  
130 derived xenografts, PDX) have advantages over prior systems for preclinical drug efficacy studies  
131 because they allow researchers to directly study human cells and tissues *in vivo*<sup>5-8</sup>. Comparisons  
132 of genome characteristics and histopathology of primary tumors and xenografts of human breast  
133 cancer<sup>9-13</sup>, ovarian cancer<sup>14</sup>, colorectal cancer<sup>15</sup> and lung cancer<sup>16-18</sup>, have demonstrated that the  
134 biological properties of patient-derived tumors are largely preserved in xenografts. A growing body  
135 of literature supports their use in cancer drug discovery and development<sup>19-21</sup>.

136 A caveat to PDX models is that intratumoral evolution can occur during engraftment and  
137 passaging<sup>11,22-25</sup>. Such evolution could potentially modify treatment response of PDXs with  
138 respect to the patient tumors<sup>23,26,27</sup>, particularly if the evolution were to systematically alter cancer-  
139 related genes. This issue is related to multi-region comparisons of patient tumors<sup>28-31</sup>, for which  
140 local mutational and immune infiltration variations have suggested differential phenotypes among  
141 multi-region samples<sup>32</sup>. However, it remains unclear how therapies should be designed with  
142 respect to this variation. Comparing patient tumor-PDX evolution to the multi-region variations  
143 within the patient tumor would clarify the importance of primary-PDX divergence for treatment.

144 Recently, Ben-David et al.<sup>26</sup> reported extensive PDX copy number divergence from the  
145 patient tumor of origin and across passages, based mainly on large-scale assessment of CNA  
146 profiles inferred from gene expression microarray data, which allowed analysis of aberrations at  
147 the scale of chromosomal arms. They raised concerns about genetic evolution in PDXs as a  
148 consequence of mouse-specific selective pressures, which could impact the capacity of PDXs for  
149 faithful modeling of patient treatment response. Such results contrast with reports that have  
150 observed genomic fidelity of PDX models with respect to the originating patient tumors and from  
151 early to late passages by direct DNA measurements (DNA sequencing or SNP arrays) in several  
152 dozen PDX models<sup>9,10,33</sup>.

153 Here we resolve these contradicting observations by systematically evaluating CNA  
154 changes and the genes they affect during engraftment and passaging in a large, internationally  
155 collected set of PDX models, comparing both RNA and DNA-based approaches. The data  
156 collected, as part of the U.S. National Cancer Institute (NCI) PDXNet (PDX Development and  
157 Trial Centers Research Network) Consortium and EurOPDX consortium, comprises 1548 PT and  
158 PDX datasets (1451 unique samples) from 509 models derived from American, European and  
159 Asian cancer patients. Our study demonstrates that prior reports of systematic copy number  
160 divergence between patient tumors and PDXs are incorrect, and that there is high retention of  
161 copy number during PDX engraftment and passaging. This work also finely enumerates the copy  
162 number profiles in hundreds of publicly available models, which will enable researchers to assess  
163 the suitability of each for individualized treatment studies.

164

## 165 **RESULTS**

### 166 **Catalog of copy number alterations in PDXs**

167 We have assembled copy number alteration (CNA) profiles of 1451 unique samples (324  
168 patient tumor, PT, and 1127 PDX samples) corresponding to 509 PDX models contributed by  
169 participating centers of the PDXNET, the EurOPDX consortium, and other published datasets<sup>9,34</sup>

170 (see METHODS, Supplementary Table 1 and Supplementary Fig. 1). We estimated copy number  
171 (CN) from five data types: single nucleotide polymorphism (SNP) array, whole-exome sequencing  
172 (WES), low-pass whole-genome sequencing (WGS), RNA sequencing (RNA-Seq) and gene  
173 expression array data, yielding 1548 tumor datasets including samples assayed on multiple  
174 platforms. Paired-normal DNA and in some cases, paired normal RNA, were also obtained to  
175 calibrate WES and RNA-Seq tumor samples. To estimate the CNA profiles for the different data  
176 types, we used tools including ASCAT for SNP arrays<sup>35</sup>, Sequenza for tumor-normal WES<sup>36</sup>,  
177 qDNAseq<sup>37</sup> and ASCAT for WGS and e-karyotyping<sup>38</sup> for gene expression (RNA-Seq and gene  
178 expression array) data (see METHODS). Copy number segments for each sample were filtered  
179 for measurement noise, median-centered, and intersected with gene coordinates (see  
180 METHODS, Supplementary Data 1).

181 The combined PDX data represent 16 broad tumor types (see METHODS), with 64%  
182 (n=324) of the models having their corresponding patient tumors assayed and another 64%  
183 (n=328) having multiple PDX samples of either varying passages (ranging from P0 – P21) or  
184 varying lineages from propagation into distinct mice (Fig. 1a, Supplementary Table 2). The  
185 distributions of PT and PDX samples across different tumor types, passages, and assay platforms  
186 (Fig. 1b, Supplementary Fig. 2-12) show the wide spectrum of this combined dataset, which is  
187 the most comprehensive copy number profiling of PDXs compiled to date. Additionally, our data  
188 include 7 patients with multiple tumors collected either from different relapse time points or  
189 different metastatic sites, resulting in multiple PDX models derived from a single patient.

190

### 191 **Comparison of CNA profiles from SNP array, WES and gene expression data**

192 To compare the CNA profiles from different platforms in a controlled fashion, we assembled a  
193 benchmarking dataset with matched measurements across multiple platforms (Supplementary  
194 Table 3, Supplementary Fig. 13 – 17). Copy number calling has been reported to be noisy for  
195 several data types<sup>39,40</sup>, and we observed that quantitative comparisons between CNA profiles are  
196 sensitive to: (1) the thresholds and baselines used to define gains and losses, (2) the dynamic  
197 range of copy number values from each platform, and (3) the differential impacts of normal cell  
198 contamination for different measurements. To control for such systematic biases, we assessed  
199 the similarity between two CNA profiles using the Pearson correlation of their  $\log_2(\text{CN ratio})$  values  
200 across the genome in 100kb windows. Regions with discrepant copy number were identified as  
201 those with outlier values from the linear regression model (see METHODS).

202



203 **CNAs from WES are consistent with CNAs from SNP array data.** While SNP arrays are widely  
204 accepted for estimating tumor CNA profiles<sup>41,42</sup>, CNA estimates from WES data have more  
205 uncertainty<sup>36,43</sup>. We implemented a WES-based CNA pipeline and benchmarked it against SNP  
206 array-based estimates for matched samples, which we used as a gold standard. Copy number  
207 gain or loss segments (see METHODS) from SNP arrays were of a higher resolution (Fig. 2a;  
208 median/mean segment size: 1.49/4.05 Mb for SNP, 4.70/14.6 Mb for WES,  $p < 2.2e^{-16}$ ) and wider  
209 dynamic range (Fig. 2b; range of  $\log_2(\text{CN ratio})$ :  $-8.62 - 2.84$  for SNP,  $-3.04 - 1.85$  for WES,  $p <$   
210  $2.2e^{-16}$ ). The difference in range is apparent in the linear regressions between platforms  
211 (Supplementary Fig. 19a). These observations take into account the broad factors affecting CNA  
212 estimates across platforms, such as the positional distribution of sequencing loci; the sequencing  
213 depth of WES (10 – 280X); and the superior removal of normal cell contamination by SNP array  
214 CNA analysis workflows using SNP allele frequencies<sup>35</sup>.

215 Despite the superiority of SNP arrays, we observed strong agreement between SNP  
216 arrays and WES, with significantly higher Pearson correlation coefficients on matched samples  
217 than samples of different models (range: 0.913 – 0.957 for matched samples, 0.0366 – 0.354 for  
218 unmatched samples,  $p = 1.02e^{-06}$ ), with the exception of 2 samples that lacked CNA aberrations  
219 (Fig. 2c, Supplementary Fig. 13, 18 and 19a). Regions with discordant copy number between  
220 platforms could also be identified (Supplementary Fig. 19a, see METHODS). The discordant copy  
221 number regions largely correspond to small focal events (average size 1.53Mb) detectable by  
222 SNP arrays but missed by WES (Supplementary Fig. 19b). Still, CNA profiling by WES is reliable  
223 in most cases, with 99% of the genome locations across the samples consistent with the values  
224 from SNP arrays.

225  
226 **Low accuracy for gene expression-derived CNA profiles.** To compare the suitability of gene  
227 expression for quantifying evolutionary changes in CNA, we adapted the e-karyotyping method  
228 used in Ben-David et al.<sup>26,38,44</sup> for RNA-Seq and gene expression array data. For each tumor type,  
229 the expression values were calibrated relative to either median expression of non-tumor tissue  
230 RNA samples, or relative to median expression of tumor samples when normal samples were not  
231 available (Supplementary Fig. 15 and 17). Copy number segments calibrated by non-tumor  
232 expression were of higher resolution (Fig. 2a; median/mean segment size: 36.0/51.9 Mb for  
233 RNASEQ NORM, 48.2/65.3 Mb for RNASEQ TUM,  $p < 2.2e^{-16}$ ; 62.0/72.4 Mb for EXPARR NORM,  
234 80.1/85.2 Mb for EXPARR TUM,  $p = 2.20e^{-07}$ ) and wider dynamic range (Fig. 2b; range of  $\log_2(\text{CN}$   
235 ratio):  $-2.07 - 2.17$  for RNASEQ NORM,  $-1.79 - 1.81$  for RNASEQ TUM,  $p < 2.2e^{-16}$ ;  $-1.40 -$   
236  $1.89$  for EXPARR NORM,  $-1.13 - 1.59$  for EXPARR TUM,  $p = 4.09e^{-07}$ ) compared to segments

237 calculated by calibration with tumor samples. This was true for both RNA-Seq and gene  
238 expression array platforms.

239 A notable problem with the expression-based calls is that the alternative expression  
240 calibrations can have a major impact on called gains and losses. This is especially apparent for  
241 regions frequently called as gains or losses in specific tumor types (Supplementary Fig. 20), e.g.  
242 as identified in other studies<sup>45-47</sup>. Chromosomes 8q and 13 were almost exclusively identified as  
243 gains and chromosomes 21 and 22 were almost exclusively as losses in the gastric cancer RNA-  
244 Seq dataset when normal samples were used for calibration. Similarly, we called exclusive gains  
245 in chromosomes 7q and 20 and losses in chromosomes 4q31-35, 8p,16q and 21 using normal  
246 samples for calibration for the hepatocellular carcinoma expression array dataset. However,  
247 changing the calibration to use tumor samples resulted in these regions being erroneously called  
248 with approximately equal frequencies of gains and losses. These alternate methodologies yielded  
249 strong variability in the CNA calls, and this was the case for each of the RNAseq and expression  
250 array datasets (Pearson correlation range: 0.218 – 0.943 for RNASEQ NORM vs TUM, 0.377 –  
251 0.869 for EXPARR NORM vs TUM, Fig. 2c and Supplementary Fig. 21). For each, this range of  
252 correlations was far greater than was observed in comparisons between the DNA-based methods  
253 ( $p = 9.37e^{-5}$  and  $p = 3.28e^{-07}$  relative to SNP vs WES). This indicates the problematic nature of  
254 RNA-based CNA calling with calibration by tumor samples, which has been used when normal  
255 samples are not available.

256 We observed other measures showing the limitations of RNA-based CNA calling.  
257 Expression-based calling had segmental resolution an order of magnitude worse than the DNA-  
258 based methods (Fig. 2a and Supplementary Fig. 14 – 17; median/mean segment size: 3.45/14.0  
259 Mb for WES, 36.0/51.9 Mb for RNASEQ NORM,  $p < 2.2e^{-16}$ ; 1.73/ 5.18 Mb for SNP, 62.0/72.4 Mb  
260 for EXPARR NORM,  $p < 2.2e^{-16}$ ). The range of detectable copy number values was also superior  
261 for DNA-based methods (Fig. 2b; range of  $\log_2(\text{CN ratio})$ :  $-6.00 - 5.33$  for WES,  $-2.07 - 2.17$  for  
262 RNASEQ NORM,  $p < 2.2e^{-16}$ ;  $-9.19 - 4.65$  for SNP,  $-1.40 - 1.89$  for EXPARR NORM,  $p < 2.2e^{-16}$ ).  
263 In addition, there was a lack of correlation between the expression-based and DNA-based  
264 methods (range: 0.0541 – 0.942 for WES vs RNASEQ (NORM); 0.00517 – 0.921 for SNP vs  
265 EXPARR (NORM)) (Fig. 2c and Supplementary Fig. 22 and 23). CNA estimates after tumor-based  
266 expression normalization resulted in further discordance with DNA-based copy number results  
267 (range:  $-0.182 - 0.929$ ,  $p = 0.0468$  for WES vs RNASEQ (TUM);  $-0.0274 - 0.847$ ,  $p = 2.20e^{-06}$   
268 for SNP vs EXPARR (TUM)). Many focal copy number events detected by DNA-based methods,  
269 as well as some larger segments, were missed by the expression-based methods (Supplementary



270 Fig. 24). Representative examples illustrating the superior resolution and accuracy from DNA-  
271 based estimates are given in Fig. 2d (see also Supplementary Fig. 19a and 25).

272

### 273 **Concordance of PDXs with patient tumors and during passaging**

274 We tracked the similarity of CNA profiles during tumor engraftment and passaging by calculating  
275 the Pearson correlation of gene-level copy-number for samples measured on the same platform  
276 (see METHODS, Supplementary Fig. 26-64). All pairs of samples derived from the same PDX  
277 model were compared – yielding 501 PT-PDX and 1257 PDX-PDX pairs.

278 For all DNA-based platforms we observed strong concordance between matched PT-PDX  
279 and PDX-PDX pairs, significantly higher than between different models from the same tumor type  
280 and the same center ( $p < 2.2e^{-16}$ ) (Fig. 3a – c, correlation heatmaps in Supplementary Fig. 27 –  
281 63). We observed no significant difference in the correlation values between PT-PDX and PDX-  
282 PDX pairs for SNP array data (median correlation PT-PDX = 0.950, PDX-PDX = 0.964;  $p > 0.05$ ),  
283 though there were small but statistically significant shifts for WES (PT-PDX = 0.874, PDX-PDX =  
284 0.936;  $p = 2.31e^{-16}$ ) and WGS data (PT-PDX = 0.914, PDX-PDX = 0.931;  $p = 0.000299$ ). PT  
285 samples have a smaller CNA range than their derived PDXs (median ratio PT/PDX / PDX/PDX:  
286 0.832/0.982,  $p = 0.000120$  for SNP; 0.626/0.996,  $p < 2.2e^{-16}$  for WES; 0.667/1.00,  $p < 2.2e^{-16}$  for  
287 WGS; Supplementary Fig. 64b and 65), which can be attributed to stromal DNA in PT samples  
288 “diluting” the CNA signal. In PDXs, the human stromal DNA is reduced<sup>9,15</sup>. The minimal effect for  
289 SNP array data confirm this interpretation – human stromal DNA contributions to CNA estimates  
290 can be removed from SNP arrays based on allele frequencies of germline heterozygous sites,  
291 while such contributions to WES and WGS have higher uncertainties.

292 We also performed intra-model comparisons using RNA-based approaches, but the  
293 Pearson correlations between pairs of samples did not clearly reproduce the Pearson correlations  
294 from DNA-based platforms for those same sample pairs (Supplementary Fig. 66a). To clarify this,  
295 we considered just the highly-correlated cases ( $>0.8$  for SNU-JAX Gastric cancer WES,  $>0.9$  for  
296 SIBS HCC SNP). We observed that the correlation values for the corresponding RNA-based  
297 methods were lower and had higher variance ( $p < 0.05$ , Supplementary Fig. 66b). In particular,  
298 the tumor-median normalization for expression data resulted in significant differences from DNA-  
299 based methods.

300

301 **Late PDX passages maintain CNA profiles similar to early passages.** Next, we asked if there  
302 is any systematic evolution of copy number during engraftment and passaging. Mouse  
303 environment-driven evolution, if present, should reduce CN correlations relative to early samples,

304 such as the primary tumor or first engraftment (P0). However, we observed no apparent effect  
305 during passaging on the SNP, WES, or WGS platforms (Fig. 3d – f, Supplementary Fig. 67). For  
306 example, the SNP data showed no significant difference between passages (Fig. 3d and  
307 Supplementary Fig. 67a). For those models having very late passages (14 breast cancer models,  
308 P18 to P21), there was a small but statistically significant correlation decrease compared to  
309 models with earlier passages ( $p < 8.98e^{-05}$ , Supplementary Fig. 68), indicating some copy number  
310 changes can occur over long-term passaging (Supplementary Fig. 38). However even at these  
311 late passages, the correlations to early passages remained high (median = 0.896). In any given  
312 comparison, only a small proportion of the genes were affected by copy number changes (median:  
313 2.72%, range: 1.03% – 11.9%). Genes that are deleted and subsequently gained in the later  
314 passages (top left quadrant of regression plots, Supplementary Fig. 69) suggest selection of  
315 preexisting minor clones as the key mechanism in these regions. For WES and WGS data, more  
316 variability in the correlations can be observed (Fig. 3e and f, Supplementary Fig. 66b and c), likely  
317 due to a few samples having more stromal contamination or low aberration levels (Supplementary  
318 Fig. 64b and 65). However, the lack of downward trend over passaging was also apparent in  
319 these sets.

320  
321 ***PDX copy number profiles trace lineages.*** We next compared the similarity of engrafted PDXs  
322 of the same model with the same passage number (i.e. all P0s, all P1s, all P2s, etc.). Surprisingly,  
323 we discovered that these fragments were not more similar than PDXs from different passage  
324 numbers (Fig. 3d – e and Supplementary Fig. 66b, IQR of correlation coefficient for same-  
325 passages/different-passages: 0.0700/0.0619 for SNP and 0.103/0.0979 for WES). To further this  
326 analysis, we defined, for JAX SNP array and PDMR WES datasets, samples within a lineage as  
327 those differing only by consecutive serial passages, while we defined lineages as split when a  
328 tumor was divided and propagated into multiple mice (Fig. 3g). For the EurOPDX CRC and BRCA  
329 WGS datasets, such lineage splitting was due only to cases with initial engraftment of different  
330 fragments of the PT, i.e., PDX samples of different passages were considered as different  
331 lineages if they originate from different PT fragments. We observed lower correlation between  
332 PDX samples from different lineages compared to within a lineage (Fig. 3h,  $p = 0.0233$  for SNP,  
333  $p = 0.00119$  for WES,  $p = 0.000232$  for WGS), despite a majority of these pairwise comparisons  
334 exhibiting high correlation ( $>0.9$ ). A few examples of models exhibiting large drift between  
335 lineages include TM01500 (Supplementary Fig. 29); 416634, 558786 and 665939  
336 (Supplementary Fig. 50); 135848 and 762968 (Supplementary Fig. 51); 245127 and 959717

337 (Supplementary Fig. 52); 287954 and 594176 (Supplementary Fig. 56); 174316 and 695221  
338 (Supplementary Fig. 57).

339 We next asked if the phylogenetic distance between samples could explain the observed  
340 shifts in the correlations. These distance relationships are clearest for the CRC and BRCA WGS  
341 sets because these models have only one lineage split occurring at the engraftment stage. We  
342 compared correlation as a function of phylogenetic distance within a lineage, which in this  
343 phylogeny is simply equal to the difference in passage number between the two samples.  
344 Increase in passage difference did not consistently reduce the correlation between samples  
345 (Supplementary Fig. 70). This suggests that lineage-splitting is often responsible for deviations in  
346 CNAs between samples, and that copy number evolution during passaging mainly arises from  
347 evolved spatial heterogeneity<sup>27</sup>.

348

349 **Genes with copy number alterations acquired during engraftment and passaging show no**  
350 **preference for cancer or treatment-related functions.**

351 Next, we investigated which genes tend to undergo copy number changes. Genes with changes  
352 during engraftment or during passaging were identified based on a residual threshold with respect  
353 to the improved linear regression<sup>48</sup> (see METHODS, Supplementary Fig. 26). A low copy number  
354 change threshold ( $|\log_2(\text{CN ratio}) \text{ change}| > 0.5$ ) was selected to include genes with subclonal  
355 alterations. To test for functional biases, we compared CNA-altered genes to gene sets with  
356 known cancer- and treatment-related functions, notably genes in TCGA oncogenic signaling  
357 pathways<sup>49</sup>; genes with copy number and expression changes associated with therapeutic  
358 sensitivity, resistance or changes in drug response from the JAX Clinical Knowledgebase<sup>50,51</sup>; and  
359 genes with frequent amplifications or deletions in the Cancer Gene Census<sup>52</sup> (Cosmic version  
360 89). We calculated the proportion of altered genes for sample pairs from each model across all  
361 platforms and tumor types. In agreement with the high maintenance of CNA profiles described  
362 above, we found the proportion of altered protein-coding genes to be low (median/IQR: 1.90%/  
363 4.11% PT-PDX, 1.25%/ 3.60% PDX-PDX pairs, Fig. 4a). Only 8.78% of PT-PDX pairs and 4.53%  
364 PDX-PDX pairs showed >10% of their protein-coding genes altered. We observed no significant  
365 increase ( $p < 0.1$ ) in alterations among any of the cancer gene sets compared to the background  
366 of all protein-coding genes, for either the PT-PDX or PDX-PDX comparisons. This provides  
367 evidence that there is no systematic selection for CNAs in oncogenic or treatment-related  
368 pathways during engraftment or passaging. We next considered tumor-type-specific effects,  
369 focusing on types with larger numbers of models to ensure statistical power (breast cancer,  
370 colorectal cancer, lung adenocarcinoma and lung squamous cell carcinoma). Genomic

371 Identification of Significant Targets in Cancer (GISTIC)<sup>53,54</sup> analysis of TCGA tumors has  
372 previously identified significantly altered genomic driver regions which can be used to differentiate  
373 tumor types and subtypes<sup>55-58</sup>. We observed no significant increase in alterations in tumor-type-  
374 specific GISTIC gene sets compared to the background ( $p < 0.1$ ) for either PT-PDX or PDX-PDX  
375 comparisons (Fig. 4b).

376

377 **Low recurrence of altered genes across models.** We tested if any particular genes often  
378 recurred in CNAs across models. Using a stringent CNA threshold ( $|\log_2(\text{CN ratio}) \text{ change}| > 1.0$   
379 with respect to linear regression model) to distinguish genes with possible functional impact (see  
380 METHODS), we observed a very low recurrent frequency (Fig. 4c), with only 12 and 2 genes  
381 recurring at  $> 5\%$  frequency for PT-PDX and PDX-PDX comparisons, respectively  
382 (Supplementary Table 4). No gene had a recurrence frequency higher than 8.96%. We observed  
383 that all these recurrent genes overlapped models in which one sample displayed an unusually  
384 large gain or loss ( $|\log_2(\text{CN ratio})| > 1.5$ ). This suggests that these regions may be subject to  
385 more noise in the CNA estimation procedure at these loci (Supplementary Fig. 71). None of these  
386 recurrent genes overlapped cancer- or treatment-related gene sets, nor did they intersect genes  
387 ( $n=3$ ) reported by Ben-David et al.<sup>26</sup> to have mouse-induced copy number changes associated  
388 with drug response in the CCLE<sup>59,60</sup> database. We further queried from CCLE data whether any  
389 of these recurrent genes showed evidence for copy number-related drug response (see  
390 METHODS, Supplementary Table 5). For the 6 genes with sufficient data available, we found no  
391 association between copy number and drug response mediated by gene expression ( $q\text{-value} <$   
392 1).

393

394 **Absence of CNA shifts in 130 WGS patient tumour, early passage PDX and late passage**  
395 **PDX trios**

396 We next investigated whether recurrent CNA changes occur in PDXs in a tumor-type specific  
397 fashion. To this aim, we analysed further the WGS-based CNA profiles of large metastatic  
398 colorectal (CRC) and breast cancer (BRCA) series (see METHODS), respectively composed of  
399 87 and 43 matched trios of patient tumour (PT), PDX at early passage (PDX-early) and PDX at  
400 later passage (PDX-late). We carried out GISTIC analysis to identify recurrent CNAs by evaluating  
401 the frequency and amplitude of observed events<sup>53,54</sup>. GISTIC was applied separately for each PT,  
402 PDX-early (P0-P1 for CRC, P0-P2 for BRCA) and PDX-late (P2-P7 for CRC, P3-P9 for BRCA)  
403 cohorts of CRC and BRCA (Supplementary Table 6). As expected, CRCs and BRCA generated  
404 different patterns of significant CNAs, with each similar to the GISTIC patterns in their respective

405 TCGA series (Supplementary Fig. 72). However, within each tumour type GISTIC profiles of the  
406 PT, PDX-early, and PDX-late cohorts were virtually indistinguishable (Fig 5a and Supplementary  
407 Fig. 72), demonstrating no gross genomic alteration systematically acquired or lost in PDXs.

408 To clarify these behaviors, we carried out gene-level analysis, where each gene was  
409 attributed the GISTIC score (G-score) of the respective segment (Supplementary Table\_7). In both  
410 the CRC and BRCA cohorts, gene-level G-scores of the PTs were highly correlated with the  
411 respective PDX-early and PDX-late cohorts (Fig. 5b and c). Moreover, PT versus PDX  
412 correlations were comparable to PDX-early versus PDX-late correlations. To search for  
413 progressive shifts, we compared the change in G-score ( $\Delta G$ ): (i) from tumor to PDX-early and (ii)  
414 from PDX-early to PDX-late. Correlations in these two  $\Delta G$  values, as shown in the bottom-right  
415 panels of Fig. 5b and c, was absent or even slightly negative. These results confirmed the  
416 absence of systematic CNA shifts in PDXs even under high resolution, gene-level analysis.

417

418 ***Lack of CNA-based functional shifts in trios confirms the absence of mouse-specific***  
419 ***evolution.*** We then considered the possibility of systematic copy number evolution at the pathway  
420 level in these triplets. To evaluate this, we performed Gene Set Enrichment Analysis (GSEA)<sup>61,62</sup>  
421 using G-scores to rank genes in each cohort (See METHODS). Consistent with the known  
422 recurrence of cancer CNAs at driver genes, multiple gene sets displayed significant enrichment  
423 in individual cohorts. To avoid spurious apparent enrichment for sets of genes with adjacent  
424 chromosomal location, we implemented an additional filter based on G-score significance (see  
425 METHODS and Supplementary Table 8). After applying the Normalized Enrichment Score (NES),  
426 FDR q-value and G-score filters, 49 gene sets were found to be significant in at least one of the  
427 three CRC cohorts, and 89 gene sets in at least one of the three BRCA cohorts (Supplementary  
428 Table 9). Importantly, control gene sets composed of GISTIC hits identified in TCGA CRC and  
429 BRCA datasets were all significant, confirming that the WGS cohorts used here correctly  
430 recapitulate the major CNA features of these two cancer types.

431 However, differences associated with PDX engraftment and passage were negligible. For  
432 both CRC and BRCA, the NES profiles for the ~8000 gene sets of PTs were highly correlated  
433 with the respective PDX-early and PDX-late cohorts (Fig. 5d and e). Moreover, PT versus PDX  
434 correlations were comparable to PDX-early versus PDX-late correlations. To search for  
435 progressive shifts, we calculated for each significant gene set  $\Delta NES$  values between PT and  
436 PDX-early, as well as between early and late PDX. Similarly to what was observed for the  $\Delta G$ -  
437 scores, as shown in the bottom-right panels of Fig. 5d and e, correlations were absent or at most  
438 slightly negative, confirming the absence of systematic CNA-based functional shifts in PDXs.

439

440 **CNA evolution across PDXs is no greater than variation in patient multi-region samples**

441 As a reference for the treatment relevance of PDX-specific evolution, we compared to levels of  
442 copy number variation in multi-region samples of patient tumors. For this we used copy number  
443 data from multi-region sampling of non-small-cell lung cancer (92 patient tumors, 295 multi-region  
444 samples) from the TRACERx Consortium<sup>31</sup>, performing analogous CNA correlation and gene  
445 analyses ( $|\text{residual}| > 0.5$ ) between multi-region pairs (Supplementary Fig. 73). We observed no  
446 significant differences in correlation ( $p > 0.05$ ) between patient multi-region and lung cancer PT-  
447 PDX pairs, while PDX-PDX pairs in fact showed significantly better correlation than the multi-  
448 region pairs ( $p < 0.05$ , Fig. 6a). These findings were consistent when tumors were grouped as  
449 adenocarcinomas, squamous cell carcinomas, or others. Cancer gene set analyses confirmed  
450 these results, with multi-region samples showing greater differences than either PT-PDX or PDX-  
451 PDX comparisons, across all the cancer gene sets considered ( $p < 0.05$ , Fig. 6b and  
452 Supplementary Fig. 74). These results show that PDX-associated CNA evolution is no greater  
453 than what patients experience naturally within their tumors. Our PDX collection also contains a  
454 few cases in which the patient tumor was assayed at multiple time points (relapse/metastasis) or  
455 multiple metastatic sites, allowing for controlled comparison of intra-patient variation versus PDX  
456 evolution (Supplementary Fig. 3, 4 and 7). We observed no significant difference between the  
457 CNA evolution during engraftment and passaging compared to the intra-patient samples (Fig. 6c).  
458 CNA profiles for these samples are shown visually in Fig. 6d.

459

460 **DISCUSSION**

461 Here we have investigated the evolutionary stability of patient-derived xenografts, an important  
462 model system for which there have been prior reports of mouse-induced copy number evolution.  
463 To better address this, we assembled the largest collection of CNA profiles of PDX models  
464 reported to date, comprising over 1500 datasets from PDX samples of multiple passages and  
465 their originating patient tumors from more than 500 PDX models across a variety of tumor types.  
466 Our analysis demonstrated the reliability of copy number estimation by DNA-based  
467 measurements over RNA-based inferences, which are substantially inferior in terms of resolution  
468 and accuracy. The importance of DNA measurements is supported by the inconsistent  
469 conclusions by two independent studies on the same PDX expression array datasets by Gao et  
470 al.<sup>19</sup> Ben-David et al.<sup>26,63</sup> concluded that drastic copy number changes, driven by mouse-specific  
471 selection, often occur within a few passages. On the other hand, Mer et al.<sup>64</sup> reported high



472 similarity between passages of the same PDX model based on direct correlations of gene  
473 expression, consistent with our findings in large, independent DNA-based datasets.

474 To understand this, we note that the CN shifts inferred by Ben-David et al. are inherently  
475 impacted by major technical issues. First, the microarray signal for PT samples is diluted by  
476 introgressed human stromal cells, while in PDXs mouse stromal transcripts hybridize only to a  
477 fraction of the human probes<sup>65</sup>. As a consequence, PT samples with substantial stromal content  
478 would display a reduced signal compared to the corresponding PDX, which can lead to an  
479 erroneous inference of systematic increase in aberrations during PDX engraftment. Second, the  
480 mouse host microenvironment can affect the transcriptional profile of the PDX tumor<sup>66</sup> and the  
481 quantity of mouse stroma can vary across passages. This can result in variability in the expression  
482 signal which can be wrongly inferred as CN changes, both from the tumor itself and through cross  
483 hybridization of mouse RNA to the human microarray. Although improved concordance in  
484 expression between PT and PDX can be achieved with RNA sequencing with the removal of  
485 mouse reads<sup>67,68</sup>, we observed that expression-based copy number inferences still have low  
486 resolution and robustness. Hence, many cancer-driving genes, which are found mainly in focal  
487 events with a size of 3Mb or lower<sup>69-72</sup>, cannot be evaluated for PDX-specific alterations. These  
488 issues are further worsened by the lack of tissue-matched normal gene expression profiles for  
489 calibration<sup>38</sup>, which have been only intermittently available but can substantially impact copy  
490 number inferences. Because of these considerations, the question of how much PDXs evolve as  
491 a consequence of mouse-specific selective pressures cannot be adequately addressed by  
492 expression data.

493 The studies we have presented here take into account the above issues by use of DNA  
494 data, as well as by assessing copy number changes by pairwise correlation/residual analysis to  
495 control for systematic biases, and they overall confirm the high retention of CNA profiles from  
496 PDX engraftment to passaging. We do observe larger deviations between PT-PDX than in PDX-  
497 PDX comparisons, though this is likely due to dilution of PT signal by human stromal cells.  
498 Interestingly, we found that a major contributor to the differences between PDX samples is  
499 lineage-specific drift associated with splitting of tumors into fragments during PDX propagation.  
500 This spatial evolution within tumors appears to affect sample comparisons more than time or the  
501 number of passages.

502 A challenge for evaluating any model system is that there is no clear threshold for genomic  
503 change that determines whether the model will still reflect patient response. Genetic variation  
504 among multi-region samples within a patient can shed light on this point, since the goal of a  
505 successful treatment would be to eradicate all of the multiple regions of the tumor. We found that

506 the copy number differences between PT and PDX are no greater than the variations among  
507 multi-region tumor samples or intra-patient samples. Thus concerns about the genetic stability of  
508 the PDX system are likely to be less important than the spatial heterogeneity of solid tumors  
509 themselves. This result is consistent with our results on lineage effects during passaging, which  
510 indicate that intratumoral spatial evolution is the major reason for genetic drift.

511 We observed no evidence for systematic mouse environment-induced selection for cancer  
512 or treatment-related genes via copy number changes, though individual cases vary (see example  
513 in Supplementary Fig. 75). Moreover, only a small fraction of sample pairs (2.44%, 43 out of 1758)  
514 shows large CNA discordance (see METHODS), suggesting that clonal selection out of a complex  
515 population is rare. These results indicate that the variations observed in PDXs are mainly due to  
516 spontaneous intratumoral evolution rather than murine pressures. The extreme cases (see  
517 Supplementary Fig. 76 for examples with same lineage) may be informative for future studies of  
518 the evolutionary process, especially through consideration of repeated spatial sampling. It may  
519 be informative to compare such examples to those reported by Eirew et al.<sup>22</sup>, who described a  
520 variety of clonal selection dynamics during engraftment and passaging for breast cancer PDXs,  
521 as well as by Ding et al.<sup>11</sup>, who demonstrated the possibility of cellular selection during xenograft  
522 formation similar to that during metastasis. While such cases are uncommon in our study, further  
523 subclonal analysis may be useful for clarifying potential selection pressures.

524 In summary, our in-depth tracking of CNAs throughout PDX engraftment and passaging  
525 confirms that tumors engrafted and passaged in PDX models maintain a high degree of molecular  
526 fidelity to the original patient tumors and their suitability for pre-clinical drug testing. Overall, we  
527 find that PDX are highly concordant with the originating patient tumor and stable through multiple  
528 passaging, and that differences are no greater than those observed spatially within patient solid  
529 tumors. At the same time, our study does not rule out that PDXs will evolve in individual  
530 trajectories over time, and for therapeutic dosing studies, the best practice is to confirm the  
531 existence of expected molecular targets and obtain sequence characterizations in the cohorts  
532 used for testing as close to the time of the treatment study as is practicable.

533

#### 534 **ACKNOWLEDGEMENTS**

535 Support for the PDXNET consortium included funding provided by the NIH to the PDXNet Data  
536 Commons and Coordination Center (NCI U24-CA224067), to the PDX Development and Trial  
537 Centers (NCI U54-CA224083, NCI U54-CA224070, NCI U54-CA224065, NCI U54-CA224076,  
538 NCI U54-CA233223, and NCI U54-CA233306) and to the National Cancer Institute Cancer  
539 Genomics Cloud (HHSN261201400008C and HHSN261201500003I). The Jackson Laboratory

540 (JAX) PDX resource data were supported by the National Cancer Institute of the National  
541 Institutes of Health under the JAX Cancer Center NCI Grant (Award Number P30CA034196). The  
542 content is solely the responsibility of the authors and does not necessarily represent the official  
543 views of the National Institutes of Health. The genomic data for JAX PDX tumors used in this work  
544 were generated by JAX Genome Technologies and Single Cell Biology Scientific Service. The  
545 development of PDX models and generation of data from Seoul National University, in  
546 collaboration with The Jackson Laboratory, was supported by the Korean Healthcare Technology  
547 R&D project through the Korean Health Industry Development Institute, funded by the Ministry of  
548 Health & Welfare, Republic of Korea (grant number: HI13C2148). Sample procurement and next  
549 generation sequencing at Huntsman Cancer Institute was performed at the Genomics and  
550 Bioinformatics Analysis and Biorepository and Molecular Pathology Shared Resources,  
551 respectively, supported by NCI P30CA042014. SNP arrays were performed at the University of  
552 Utah Health Sciences Center Genomics Core. We are grateful to Michael P. Klein for assistance  
553 with SNP array data. M.H.B. is funded by the National Institutes of Health under Ruth L.  
554 Kirschstein National Research Service Award T32HG008962 from the National Human Genome  
555 Research Institute. M.T.L. is supported by a P30 Cancer Center Support Grant CA125123 and a  
556 Core Facility Support Grant from the Cancer Research and Prevention Initiative of Texas  
557 RP170691. PDX generation and whole exome sequencing at the University of Texas MD  
558 Anderson Cancer Center were supported by the University of Texas MD Anderson Cancer Center  
559 Moon Shots Program, Specialized Program of Research Excellence (SPORE) grant CA070907.  
560 The development of PDX models and generation of data from Wistar Institute was supported by  
561 National Cancer Institute, National Institutes of Health (NCI R50-CA211199). PDMR data has  
562 been funded in whole or in part with federal funds from the National Cancer Institute, National  
563 Institutes of Health (Contract Number HHSN261200800001E). The content of this publication  
564 does not necessarily reflect the views or policies of the Department of Health and Human  
565 Services, nor does mention of trade names, commercial products, or organizations imply  
566 endorsement by the U.S. Government. The breast cancer PDX models from Washington  
567 University used for this study were developed in part through the support from The Breast Cancer  
568 Research Foundation and Fashion Footwear Charitable Foundation of New York, Inc.. The  
569 pancreatic cancer PDX models from Washington University used in this study were developed  
570 with the support of NCI grants P50 CA196510, P30 CA091842 and The Foundation for Barnes-  
571 Jewish Hospital's Cancer Frontier Fund through the Siteman Cancer Center Investment Program.  
572 The data for these models was provided by U54 CA224083. Support for the EurOPDX consortium  
573 included funding provided by Fondazione AIRC under 5 per Mille 2018 - ID. 21091 program

574 (E.M., A.B., L.T.), AIRC Investigator Grants 18532 (L.T.) and 20697 (A.B.), AIRC/CRUK/FC  
575 AECC Accelerator Award 22795 (L.T.), EU H2020 Research and Innovation Programme, grant  
576 agreement no. 731105 “EDIReX” (E.M., A.B., L.T., A.T.B., V.S., J.J.), Fondazione Piemontese  
577 per la Ricerca sul Cancro-ONLUS 5 per mille Ministero della Salute 2015 (E.M., L.T.), 2014  
578 and 2016 (L.T.), My First AIRC Grant (MFAG) 19047 (C.I.), EU H2020 Research and Innovation  
579 Programme, Grant Agreement No. 754923 “COLOSSUS” (A.T.B., D.L., L.T.), European Research  
580 Council Consolidator Grant 724748 – BEAT (A.B.), Science Foundation Ireland under grant  
581 13/CDA/2183 “COLOFORETELL’ (A.T.B), Irish Health Research Board grant ILP-POR-2019-066  
582 (A.T.B.), ISCI - Miguel Servet program CP14/00228 and GHD-Pink/FERO Foundation grant  
583 (V.S.), Netherlands Organization for Scientific Research (NWO) Vici grant 91814643 (J.J.),  
584 European Research Council (ERC) Synergy project CombatCancer (J.J.), Onco Institute (J.J.,  
585 R.d.B.) and Dutch Cancer Society (J.J., R.d.B.) , NCI grant U24 CA204781 (J.H.C., T.F.M.). The  
586 authors thank the Breast Cancer Group from VHIO for providing study materials. We thank Debbie  
587 M. Krupke from The Jackson Laboratory for assistance with organizing the tumor type information.  
588

#### 589 **AUTHOR CONTRIBUTIONS**

590 X.Y.W., C.J.B., J.J., A.T.B., L.T, J.A.M., C.I., E.M. and J.H.C. conceived and jointly supervised  
591 the study. X.Y.W. organized the study, collected and structured the data, and designed and  
592 carried out the analyses. J.G. collected and organized the EurOPDX data and carried out the  
593 analyses. X.Y.W., E.M. and J.H.C. wrote the manuscript. J.G, C.I, Z.-M.Z., A.S., and M.W.L.  
594 contributed to the refinement of the manuscript. A.S. and M.W.L developed the workflows. A.S.,  
595 Z.-M.Z, M.W.L, and Y.-S.S assisted with the computational analyses. R.J., C.F., J.R., D.A.D, J.R.  
596 and B.D. assisted with the workflow development and data collection and organization on the  
597 Cancer Genomics Cloud. R.E.B. and R.d.B. contributed to sample selection and processing of  
598 EurOPDX data. C.J.B., R.P., L.C., Y.A.E., J.H.D., S.S., M.B., C.-H.Y., E.C.-S., A.L.W, B.E.W.,  
599 M.T.L., Y.X., J.W., B.F., J.R., F.M.-B., J.W., A.V.K., V.R., M.H., H.S., R.J.M., S.D., L.D., F.G.,  
600 A.B., L.T., A.L., A.C.O., A.T.B., E.M., D.L., R.d.B., P.t.B., J.J., V.S., E. Marangoni, H.K., J.-I.K.,  
601 H.-K.Y., C.L., E.M. and J.H.C. contributed the sequencing and array data. C.J.B., E.M. and J.H.C.  
602 directed the project. The named author list describes the primary contributors of data and analysis  
603 to the project, though these studies were supported by consortium-wide activities. All members  
604 of the PDXNet and EurOPDX Consortia participated in group discussions or supportive analyses  
605 regarding the study design, data standards, sample collection, or data analysis approaches.  
606

#### 607 **COMPETING FINANCIAL INTERESTS**

608 A.L.W and B.E.W receive a portion of royalties if University of Utah licenses certain PDX models  
609 to for-profit entities. M.T.L is a founder of, and equity stake holder in, Tvardi Therapeutics Inc., a  
610 founder of, and limited partner in, StemMed Ltd., and a Manager in StemMed Holdings LLC. He  
611 also receives a portion of royalties if Baylor College of Medicine licenses certain PDX models to  
612 for-profit entities. F.M.-B. reports receiving commercial research grants from Novartis,  
613 AstraZeneca, Calithera, Aileron, Bayer, Jounce, CytoMx, eFFECTOR, Zymeworks, PUMA  
614 Biotechnology, Curis, Millennium, Daiichi Sankyo, Abbvie, Guardant Health, Takeda, Seattle  
615 Genetics, and GlaxoSmithKline as well as grants and travel related fees from Taiho, Genentech,  
616 Debiopharm Group, and Pfizer. She also served as a consultant to Pieris, Dialectica, Sumitomo  
617 Dainippon, Samsung Bioepis, Aduro, Origimed, Xencor, The Jackson Laboratory, Zymeworks,  
618 Kolon Life Science, and Parexel International, and advisor to Inflection Biosciences, GRAIL,  
619 Darwin Health, Spectrum, Mersana, and Seattle Genetics. L.T. reports receiving research grants  
620 from Symphogen, Servier, Pfizer, and Merus, and he is in the speakers' bureau of Eli Lilly,  
621 AstraZeneca, and Merck KGaA. J.J. reports receiving funding for collaborative research from  
622 Artios Pharma. He also serves as SAB member of Artios Pharma. The other authors declare no  
623 competing financial interests.

624

## 625 **FIGURE LEGENDS**

626 **Figure 1. PDXNet and EurOPDX patient derived xenograft datasets used for copy number**  
627 **profiling across 16 tumor types. (a)** Numbers of PDX models for each tumor type, with models  
628 also having multiple PDX samples or having matched patient tumor samples specified. **(b)**  
629 Distributions of datasets by passage number and assay platform for patient tumors and PDX  
630 samples, separated by tumor type. "Late" passages include P18, P19 and P21 samples.

631

632 **Figure 2. Comparisons of resolution and accuracy for copy number alterations estimated**  
633 **by DNA-based and expression-based methods. (a)** Pairwise comparisons of distributions of  
634 segment size (Mb) of CNAs estimated by different measurement platforms in the benchmarking  
635 dataset (see Supplementary Table 3). CNAs are regions with  $(|\log_2(\text{CN ratio})| \geq 0.1)$ . P-values  
636 indicate significance of difference between distributions by Wilcoxon rank sum test. **(b)** Pairwise  
637 comparisons of distributions of  $\log_2(\text{CN ratio})$  of CNA segments. P-values were computed by  
638 Kolmogorov-Smirnov test. **(c)** Distributions of Pearson correlation coefficient of median-centered  
639  $\log_2(\text{CN ratio})$  in 100-kb windows from CNA segments between pairs of samples estimated by  
640 different platforms (see Supplementary Table 3). Samples with non-aberrant profiles in SNP array  
641 and WES data are omitted (Range (5-95 percentile) of  $\log_2(\text{CN ratio}) < 0.3$ ). P-values indicate

642 Wilcoxon rank sum test. **(d)** Examples of CNA profiles in comparisons of different platforms.  
643 Pearson correlation coefficients of CNA segments between pairs of samples are shown on the  
644 right. (SNP: SNP array, WES: whole-exome sequencing, RNASEQ: RNA sequencing, EXPARR:  
645 gene expression array, NORM: normalization by median expression of normal samples, TUM:  
646 normalization by median expression of tumor samples)

647

648 **Figure 3. Comparisons of copy number alterations from patient tumor to early and late PDX**  
649 **passages. (a-c)** Distributions of Pearson correlation coefficient of gene-based copy number,  
650 estimated by **(a)** SNP array, **(b)** WES, and **(c)** WGS, between: PT-PDX samples from the same  
651 model; PDX-PDX samples of the same model; and samples of different models from a common  
652 tumor type and contributing center. P-values were computed by Wilcoxon rank sum test (ns: not  
653 significant p-value > 0.05). **(d-f)** Distributions of Pearson correlation coefficients of gene-based  
654 copy number, estimated by **(d)** SNP array, **(e)** WES, and **(f)** WGS, among patient tumor and PDX  
655 passages of the same model. Comparisons relative to PT and P0 are shown (higher passages  
656 are shown in Supplementary Fig. 66). **(g)** Schematic of lineage splitting during passaging and  
657 expansion of tumors into multiple mice. This is a simplified illustration for passaging procedures  
658 in which different fragments of a tumor are implanted into different mice. **(h)** Pearson correlation  
659 distributions for PDX sample pairs of different lineages and sample pairs within the same lineage:  
660 for JAX SNP array, PDMR WES, and EuroPDX WGS datasets. P-values were computed by  
661 Wilcoxon rank sum test. The numbers in the parentheses represent the number of pairwise  
662 correlations.

663

664 **Figure 4. Cancer pathway analysis for copy number altered genes during engraftment and**  
665 **passaging. (a)** Distribution of proportion of altered genes for pairwise comparisons of PDX  
666 samples for various gene sets: Protein-coding genes annotated by Ensembl; Oncogenic signaling  
667 pathways identified by TCGA<sup>49</sup>; JAX CKB<sup>50,51</sup> Amp indicates genes with copy number gain or  
668 over-expression associated with therapeutic sensitivity or resistance; JAX CKB Del indicates  
669 genes with copy number loss or under-expression associated with therapeutic sensitivity or  
670 resistance; Census Amp Del indicates genes with frequent amplifications or deletions in the  
671 Cancer Gene Census<sup>52</sup>. CNA genes were identified by  $|\text{residual}| > 0.5$  from linear regression  
672 model. P-values were computed by Wilcoxon rank sum test (ns: not significant,  $p > 0.1$ ). **(b)**  
673 Distribution of proportion of altered genes for pairwise comparisons within breast cancer,  
674 colorectal cancer, lung adenocarcinoma (LUAD) and lung squamous cell carcinoma (LUSC)  
675 models. Prevalence of alterations in significantly amplified (TCGA Gistic Amp) or deleted (TCGA



676 Gistic Del) genes for the corresponding tumor type are shown. P-values were computed by  
677 Wilcoxon rank sum test (ns: not significant,  $p > 0.1$ ). The numbers in the parentheses in the  
678 horizontal axis represent the number of genes, and those in the plot title represent the number of  
679 pairwise correlations. (c) Recurrence frequency of protein coding genes with copy number  
680 alterations,  $|\text{residual}| > 1$ , across all models in PT-PDX and PDX-PDX comparisons.

681

682 **Figure 5. Absence of mouse-driven recurrent CNAs during engraftment and propagation**

683 **of colorectal and breast cancer PDXs.** (a) Bar charts representing genome-wide GISTIC G-  
684 score for amplifications (red) and deletions (blue) in each of the three cohorts (PT, PDX-early,  
685 PDX-late) for CRC and BRCA. (b-c) Scatter plots comparing gene-level GISTIC G-score between  
686 each of the three cohorts, for (b) CRC and (c) BRCA. Bottom-right panels of (b) and (c): scatter  
687 plots comparing  $\Delta$ G-scores from PT to PDX-early and from PDX early to PDX-late. (d-e) Scatter  
688 plots comparing GSEA Normalized Enrichment Score (NES) for gene sets between each of the  
689 three cohorts, for (d) CRC (e) and BRCA. Grey dots: all gene sets; red dots: gene sets significantly  
690 enriched in at least one among the PT, PDX-early, PDX-late cohorts. Bottom-right panels of (d)  
691 and (e): scatter plots comparing  $\Delta$ NES from PT to PDX-early and from PDX-early to PDX-late.

692

693 **Figure 6. Comparison of CNA variation during PDX engraftment and passaging to CNA**

694 **variation among patient multi-region, tumor relapse, and metastasis samples.** (a)  
695 Distributions of Pearson correlation coefficients of gene-based copy number for lung  
696 adenocarcinoma (LUAD), lung squamous cell carcinoma (LUSC), and other lung cancer  
697 subtypes. Columns compare: multi-region tumor samples from TRACERx<sup>31</sup>; PT-PDX samples  
698 from the same model; and PDX-PDX samples from the same model. P-values indicate Wilcoxon  
699 rank sum test (ns:  $p\text{-value} > 0.05$ ). (b) Distributions of proportion of altered genes between multi-  
700 region tumor pairs from TRACERx, and PT-PDX and PDX-PDX pairs for various gene sets for  
701 LUAD and LUSC. Gene sets are the same as in Fig. 4. TCGA Gistic and JAX CKB gene sets are  
702 shown (other gene sets are shown in Supplementary Fig. 76). (c) Distributions of Pearson  
703 correlation coefficients of gene-based copy number between intra-patient PT  
704 (primary/relapse/metastasis) pairs from the same patient and corresponding PT-PDX/PDX-PDX  
705 (derived from the same model; a different PT sample from the same patient generates a different  
706 model) pairs from the same set of patients. P-values were computed by Wilcoxon rank sum test  
707 (ns:  $p\text{-value} > 0.05$ ). (d) CNA profiles of PT and PDX samples from patients with multiple PDX  
708 models from multiple PT collection (primary/relapse/metastasis).

709

710 **REFERENCES**

- 711 1. Richmond, A. & Su, Y. Mouse xenograft models vs GEM models for human cancer  
712 therapeutics. *Disease models & mechanisms* **1**, 78-82 (2008).
- 713 2. Walrath, J.C., Hawes, J.J., Van Dyke, T. & Reilly, K.M. Genetically engineered mouse  
714 models in cancer research. *Advances in cancer research* **106**, 113-164 (2010).
- 715 3. Dennis, C. Off by a whisker. *Nature* **442**, 739-741 (2006).
- 716 4. Hait, W.N. Anticancer drug development: the grand challenges. *Nature Reviews Drug*  
717 *Discovery* **9**, 253 (2010).
- 718 5. Shultz, L.D., Ishikawa, F. & Greiner, D.L. Humanized mice in translational biomedical  
719 research. *Nature Reviews Immunology* **7**, 118 (2007).
- 720 6. Brehm, M.A., Shultz, L.D. & Greiner, D.L. Humanized mouse models to study human  
721 diseases. *Current opinion in endocrinology, diabetes, and obesity* **17**, 120-125 (2010).
- 722 7. Hidalgo, M. *et al.* Patient-Derived Xenograft Models: An Emerging Platform for  
723 Translational Cancer Research. *Cancer Discovery* **4**, 998 (2014).
- 724 8. Byrne, A.T. *et al.* Interrogating open issues in cancer precision medicine with patient-  
725 derived xenografts. *Nature Reviews Cancer* **17**, 254 (2017).
- 726 9. DeRose, Y.S. *et al.* Tumor grafts derived from women with breast cancer authentically  
727 reflect tumor pathology, growth, metastasis and disease outcomes. *Nature Medicine* **17**,  
728 1514 (2011).
- 729 10. Bruna, A. *et al.* A Biobank of Breast Cancer Explants with Preserved Intra-tumor  
730 Heterogeneity to Screen Anticancer Compounds. *Cell* **167**, 260-274.e22 (2016).
- 731 11. Ding, L. *et al.* Genome remodelling in a basal-like breast cancer metastasis and xenograft.  
732 *Nature* **464**, 999 (2010).
- 733 12. Landis, M.D., Lehmann, B.D., Pietenpol, J.A. & Chang, J.C. Patient-derived breast tumor  
734 xenografts facilitating personalized cancer therapy. *Breast Cancer Research* **15**, 201  
735 (2013).
- 736 13. Reyal, F. *et al.* Molecular profiling of patient-derived breast cancer xenografts. *Breast*  
737 *Cancer Research* **14**, R11 (2012).
- 738 14. Bankert, R.B. *et al.* Humanized Mouse Model of Ovarian Cancer Recapitulates Patient  
739 Solid Tumor Progression, Ascites Formation, and Metastasis. *PLOS ONE* **6**, e24420 (2011).
- 740 15. Julien, S. *et al.* Characterization of a Large Panel of Patient-Derived Tumor Xenografts  
741 Representing the Clinical Heterogeneity of Human Colorectal Cancer. *Clinical Cancer*  
742 *Research* **18**, 5314-5328 (2012).
- 743 16. Reddy, S., Piccione, D., Takita, H. & Bankert, R.B. Human Lung Tumor Growth Established  
744 in the Lung and Subcutaneous Tissue of Mice with Severe Combined Immunodeficiency.  
745 *Cancer Research* **47**, 2456-2460 (1987).
- 746 17. Simpson-Abelson, M.R. *et al.* Long-Term Engraftment and Expansion of Tumor-Derived  
747 Memory T Cells Following the Implantation of Non-Disrupted Pieces of Human Lung  
748 Tumor into NOD-scid IL2R $\gamma$  null Mice. *The Journal of Immunology* **180**, 7009-  
749 7018 (2008).
- 750 18. Sugiyama, Y. *et al.* Human Inflammatory Cells Within the Tumor Microenvironment of  
751 Lung Tumor Xenografts Mediate Tumor Growth Suppression in Situ that Depends on and  
752 Is Augmented by Interleukin-12. *Journal of Immunotherapy* **24**, 37-45 (2001).

- 753 19. Gao, H. *et al.* High-throughput screening using patient-derived tumor xenografts to  
754 predict clinical trial drug response. *Nature Medicine* **21**, 1318 (2015).
- 755 20. Hidalgo, M. *et al.* A Pilot Clinical Study of Treatment Guided by Personalized Tumorgrafts  
756 in Patients with Advanced Cancer. *Molecular Cancer Therapeutics* **10**, 1311-1316 (2011).
- 757 21. Tentler, J.J. *et al.* Patient-derived tumour xenografts as models for oncology drug  
758 development. *Nature reviews. Clinical oncology* **9**, 338-350 (2012).
- 759 22. Eirew, P. *et al.* Dynamics of genomic clones in breast cancer patient xenografts at single-  
760 cell resolution. *Nature* **518**, 422 (2014).
- 761 23. Cho, S.-Y. *et al.* Unstable genome and transcriptome dynamics during tumor metastasis  
762 contribute to therapeutic heterogeneity in colorectal cancers. *Clinical Cancer Research*,  
763 clincanres.3460.2018 (2019).
- 764 24. Giessler, K.M. *et al.* Genetic subclone architecture of tumor clone-initiating cells in  
765 colorectal cancer. *The Journal of Experimental Medicine* **214**, 2073 (2017).
- 766 25. Sato, K. *et al.* Multiregion Genomic Analysis of Serially Transplanted Patient-derived  
767 Xenograft Tumors. *Cancer Genomics - Proteomics* **16**, 21-27 (2019).
- 768 26. Ben-David, U. *et al.* Patient-derived xenografts undergo mouse-specific tumor evolution.  
769 *Nature Genetics* **49**, 1567 (2017).
- 770 27. Kim, H. *et al.* High-resolution deconstruction of evolution induced by chemotherapy  
771 treatments in breast cancer xenografts. *Scientific Reports* **8**, 17937 (2018).
- 772 28. de Bruin, E.C. *et al.* Spatial and temporal diversity in genomic instability processes defines  
773 lung cancer evolution. *Science* **346**, 251-256 (2014).
- 774 29. Gerlinger, M. *et al.* Genomic architecture and evolution of clear cell renal cell carcinomas  
775 defined by multiregion sequencing. *Nature Genetics* **46**, 225 (2014).
- 776 30. Gerlinger, M. *et al.* Intratumor Heterogeneity and Branched Evolution Revealed by  
777 Multiregion Sequencing. *New England Journal of Medicine* **366**, 883-892 (2012).
- 778 31. Jamal-Hanjani, M. *et al.* Tracking the Evolution of Non-Small-Cell Lung Cancer. *New*  
779 *England Journal of Medicine* **376**, 2109-2121 (2017).
- 780 32. Rosenthal, R. *et al.* Neoantigen-directed immune escape in lung cancer evolution. *Nature*  
781 **567**, 479-485 (2019).
- 782 33. Li, S. *et al.* Endocrine-therapy-resistant ESR1 variants revealed by genomic  
783 characterization of breast-cancer-derived xenografts. *Cell Rep* **4**, 1116-30 (2013).
- 784 34. He, S. *et al.* PDXliver: a database of liver cancer patient derived xenograft mouse models.  
785 *BMC Cancer* **18**, 550 (2018).
- 786 35. Van Loo, P. *et al.* Allele-specific copy number analysis of tumors. *Proc Natl Acad Sci U S A*  
787 **107**, 16910-5 (2010).
- 788 36. Favero, F. *et al.* Sequenza: allele-specific copy number and mutation profiles from tumor  
789 sequencing data. *Ann Oncol* **26**, 64-70 (2015).
- 790 37. Scheinin, I. *et al.* DNA copy number analysis of fresh and formalin-fixed specimens by  
791 shallow whole-genome sequencing with identification and exclusion of problematic  
792 regions in the genome assembly. *Genome research* **24**, 2022-2032 (2014).
- 793 38. Ben-David, U., Mayshar, Y. & Benvenisty, N. Virtual karyotyping of pluripotent stem cells  
794 on the basis of their global gene expression profiles. *Nature Protocols* **8**, 989 (2013).
- 795 39. Zare, F., Hosny, A. & Nabavi, S. Noise cancellation using total variation for copy number  
796 variation detection. *BMC Bioinformatics* **19**, 361 (2018).

- 797 40. Wineinger, N.E. & Tiwari, H.K. The Impact of Errors in Copy Number Variation Detection  
798 Algorithms on Association Results. *PLOS ONE* **7**, e32396 (2012).
- 799 41. Zack, T.I. *et al.* Pan-cancer patterns of somatic copy number alteration. *Nat Genet* **45**,  
800 1134-40 (2013).
- 801 42. Taylor, A.M. *et al.* Genomic and Functional Approaches to Understanding Cancer  
802 Aneuploidy. *Cancer Cell* **33**, 676-689.e3 (2018).
- 803 43. Talevich, E., Shain, A.H., Botton, T. & Bastian, B.C. CNVkit: Genome-Wide Copy Number  
804 Detection and Visualization from Targeted DNA Sequencing. *PLoS Comput Biol* **12**,  
805 e1004873 (2016).
- 806 44. Ben-David, U. *et al.* The landscape of chromosomal aberrations in breast cancer mouse  
807 models reveals driver-specific routes to tumorigenesis. *Nature Communications* **7**, 12160  
808 (2016).
- 809 45. Schumacher, S.E. *et al.* Somatic copy number alterations in gastric adenocarcinomas  
810 among Asian and Western patients. *PLOS ONE* **12**, e0176045 (2017).
- 811 46. The Cancer Genome Atlas Research, N. *et al.* Comprehensive molecular characterization  
812 of gastric adenocarcinoma. *Nature* **513**, 202 (2014).
- 813 47. Ally, A. *et al.* Comprehensive and Integrative Genomic Characterization of Hepatocellular  
814 Carcinoma. *Cell* **169**, 1327-1341.e23 (2017).
- 815 48. Motulsky, H.J. & Brown, R.E. Detecting outliers when fitting data with nonlinear  
816 regression – a new method based on robust nonlinear regression and the false discovery  
817 rate. *BMC Bioinformatics* **7**, 123 (2006).
- 818 49. Sanchez-Vega, F. *et al.* Oncogenic Signaling Pathways in The Cancer Genome Atlas. *Cell*  
819 **173**, 321-337.e10 (2018).
- 820 50. Patterson, S.E. *et al.* The clinical trial landscape in oncology and connectivity of somatic  
821 mutational profiles to targeted therapies. *Human Genomics* **10**, 4 (2016).
- 822 51. Patterson, S.E., Statz, C.M., Yin, T. & Mockus, S.M. Utility of the JAX Clinical  
823 Knowledgebase in capture and assessment of complex genomic cancer data. *npj Precision*  
824 *Oncology* **3**, 2 (2019).
- 825 52. Sondka, Z. *et al.* The COSMIC Cancer Gene Census: describing genetic dysfunction across  
826 all human cancers. *Nature Reviews Cancer* **18**, 696-705 (2018).
- 827 53. Beroukhi, R. *et al.* Assessing the significance of chromosomal aberrations in cancer:  
828 Methodology and application to glioma. *Proceedings of the National Academy of Sciences*  
829 **104**, 20007 (2007).
- 830 54. Mermel, C.H. *et al.* GISTIC2.0 facilitates sensitive and confident localization of the targets  
831 of focal somatic copy-number alteration in human cancers. *Genome Biology* **12**, R41  
832 (2011).
- 833 55. The Cancer Genome Atlas, N. *et al.* Comprehensive molecular portraits of human breast  
834 tumours. *Nature* **490**, 61 (2012).
- 835 56. The Cancer Genome Atlas, N. *et al.* Comprehensive molecular characterization of human  
836 colon and rectal cancer. *Nature* **487**, 330 (2012).
- 837 57. The Cancer Genome Atlas Research, N. *et al.* Comprehensive molecular profiling of lung  
838 adenocarcinoma. *Nature* **511**, 543 (2014).
- 839 58. The Cancer Genome Atlas Research, N. *et al.* Comprehensive genomic characterization of  
840 squamous cell lung cancers. *Nature* **489**, 519 (2012).

- 841 59. Barretina, J. *et al.* The Cancer Cell Line Encyclopedia enables predictive modelling of  
842 anticancer drug sensitivity. *Nature* **483**, 603 (2012).
- 843 60. Ghandi, M. *et al.* Next-generation characterization of the Cancer Cell Line Encyclopedia.  
844 *Nature* **569**, 503-508 (2019).
- 845 61. Subramanian, A. *et al.* Gene set enrichment analysis: A knowledge-based approach for  
846 interpreting genome-wide expression profiles. *Proceedings of the National Academy of*  
847 *Sciences* **102**, 15545 (2005).
- 848 62. Mootha, V.K. *et al.* PGC-1 $\alpha$ -responsive genes involved in oxidative phosphorylation are  
849 coordinately downregulated in human diabetes. *Nature Genetics* **34**, 267-273 (2003).
- 850 63. Ben-David, U., Beroukhi, R. & Golub, T.R. Genomic evolution of cancer models: perils  
851 and opportunities. *Nature Reviews Cancer* **19**, 97-109 (2019).
- 852 64. Mer, A.S. *et al.* Integrative pharmacogenomics analysis of patient-derived xenografts.  
853 *Cancer Research*, canres.0349.2019 (2019).
- 854 65. Isella, C. *et al.* Stromal contribution to the colorectal cancer transcriptome. *Nature*  
855 *Genetics* **47**, 312 (2015).
- 856 66. Park, E.S. *et al.* Cross-species hybridization of microarrays for studying tumor  
857 transcriptome of brain metastasis. *Proceedings of the National Academy of Sciences* **108**,  
858 17456 (2011).
- 859 67. Liu, Y. *et al.* Gene expression differences between matched pairs of ovarian cancer patient  
860 tumors and patient-derived xenografts. *Scientific Reports* **9**, 6314 (2019).
- 861 68. Isella, C. *et al.* Selective analysis of cancer-cell intrinsic transcriptional traits defines novel  
862 clinically relevant subtypes of colorectal cancer. *Nature Communications* **8**, 15107 (2017).
- 863 69. Leary, R.J. *et al.* Integrated analysis of homozygous deletions, focal amplifications, and  
864 sequence alterations in breast and colorectal cancers. *Proceedings of the National*  
865 *Academy of Sciences* **105**, 16224 (2008).
- 866 70. Bierkens, M. *et al.* Focal aberrations indicate EYA2 and hsa-miR-375 as oncogene and  
867 tumor suppressor in cervical carcinogenesis. *Genes, Chromosomes and Cancer* **52**, 56-68  
868 (2013).
- 869 71. Krijgsman, O., Carvalho, B., Meijer, G.A., Steenbergen, R.D.M. & Ylstra, B. Focal  
870 chromosomal copy number aberrations in cancer—Needles in a genome haystack.  
871 *Biochimica et Biophysica Acta (BBA) - Molecular Cell Research* **1843**, 2698-2704 (2014).
- 872 72. Bignell, G.R. *et al.* Signatures of mutation and selection in the cancer genome. *Nature* **463**,  
873 893 (2010).
- 874
- 875

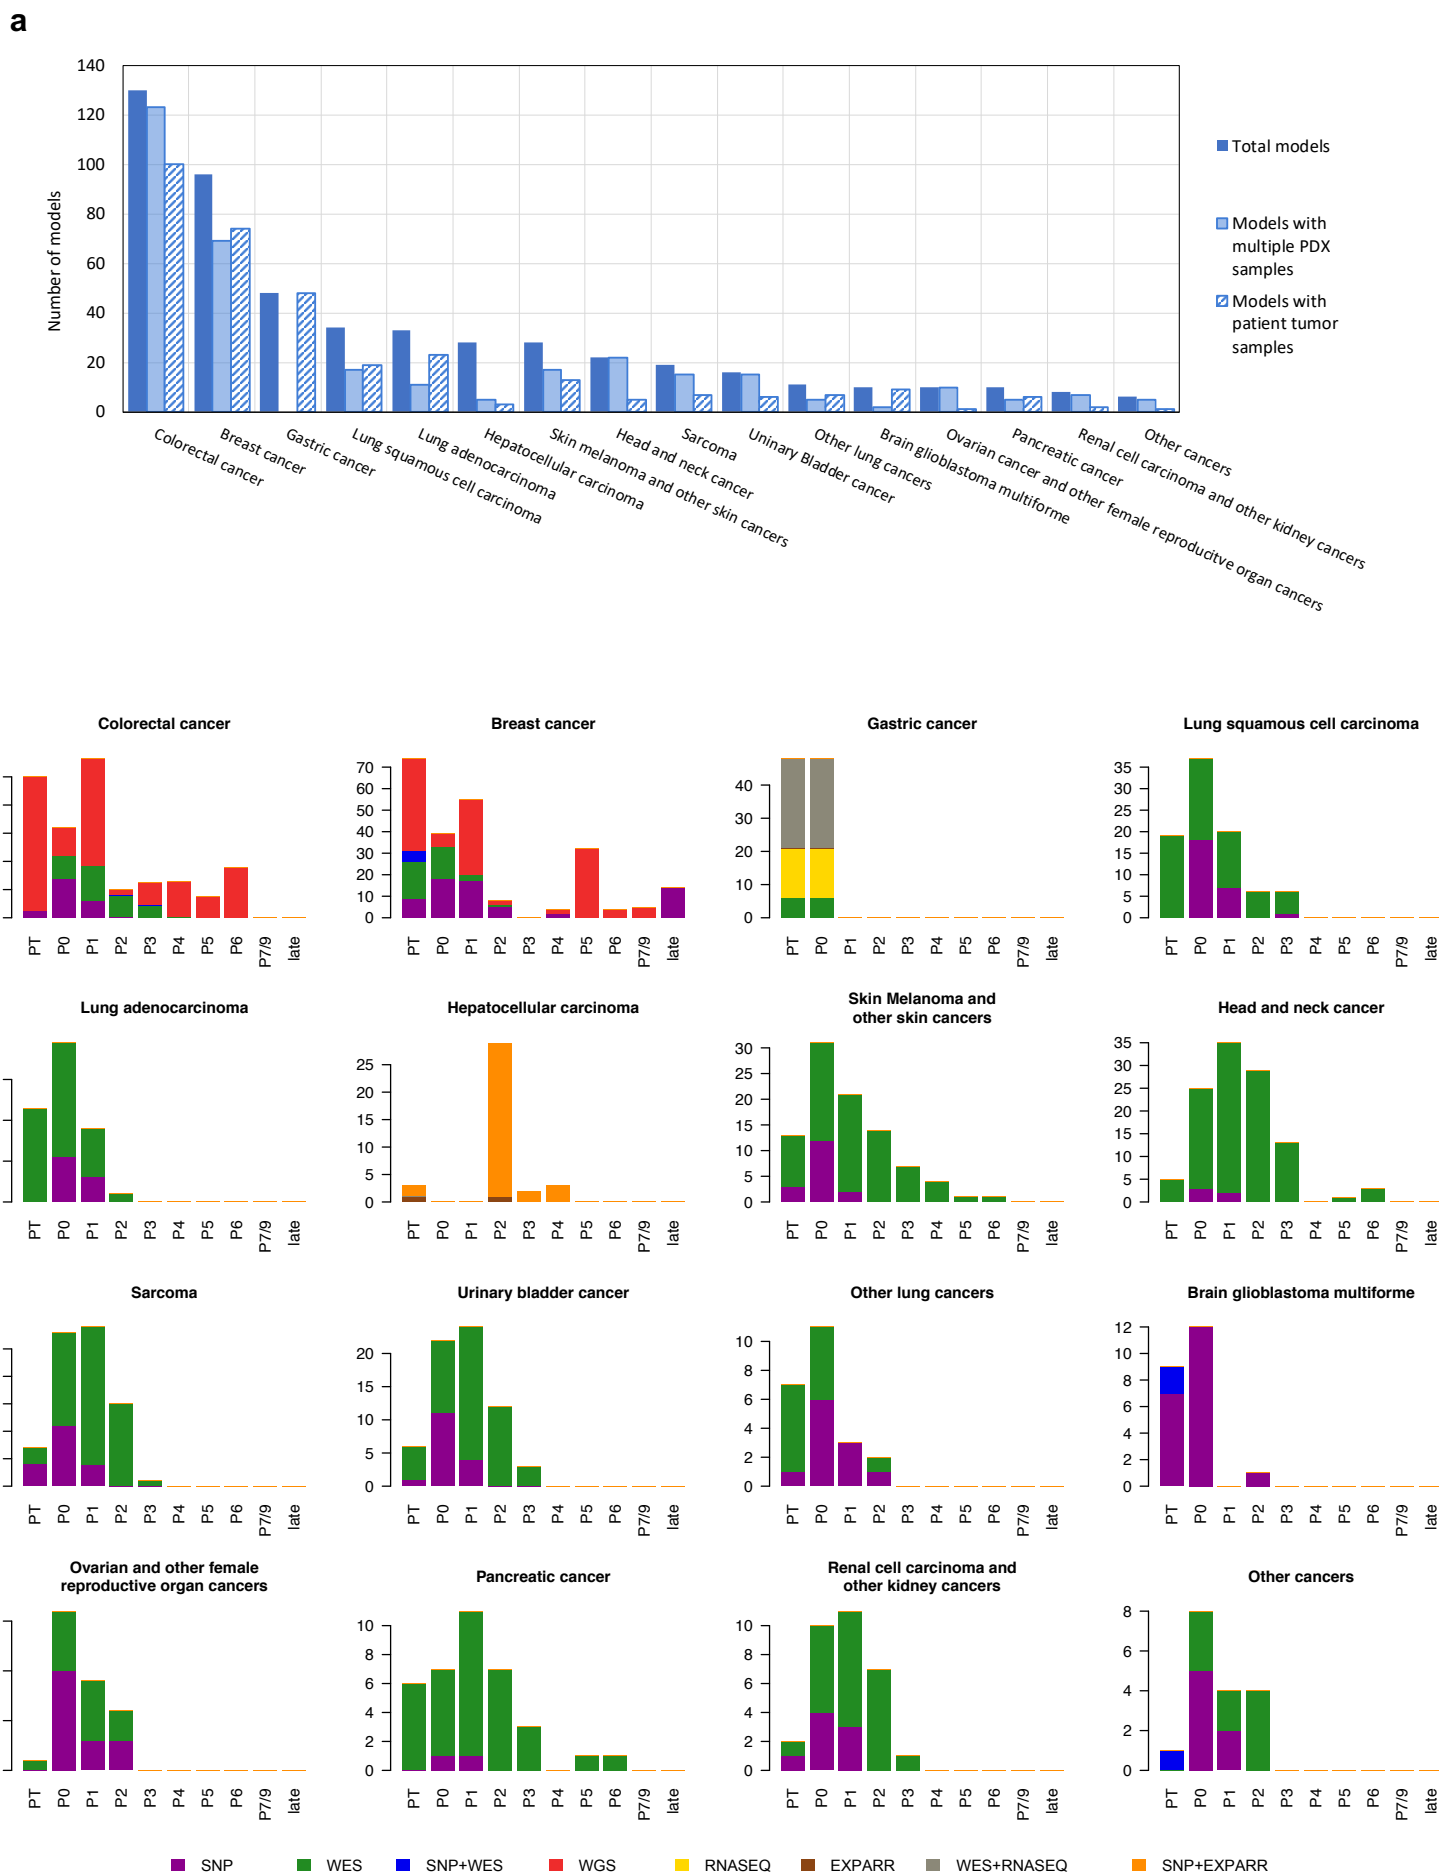

**Figure 1.**



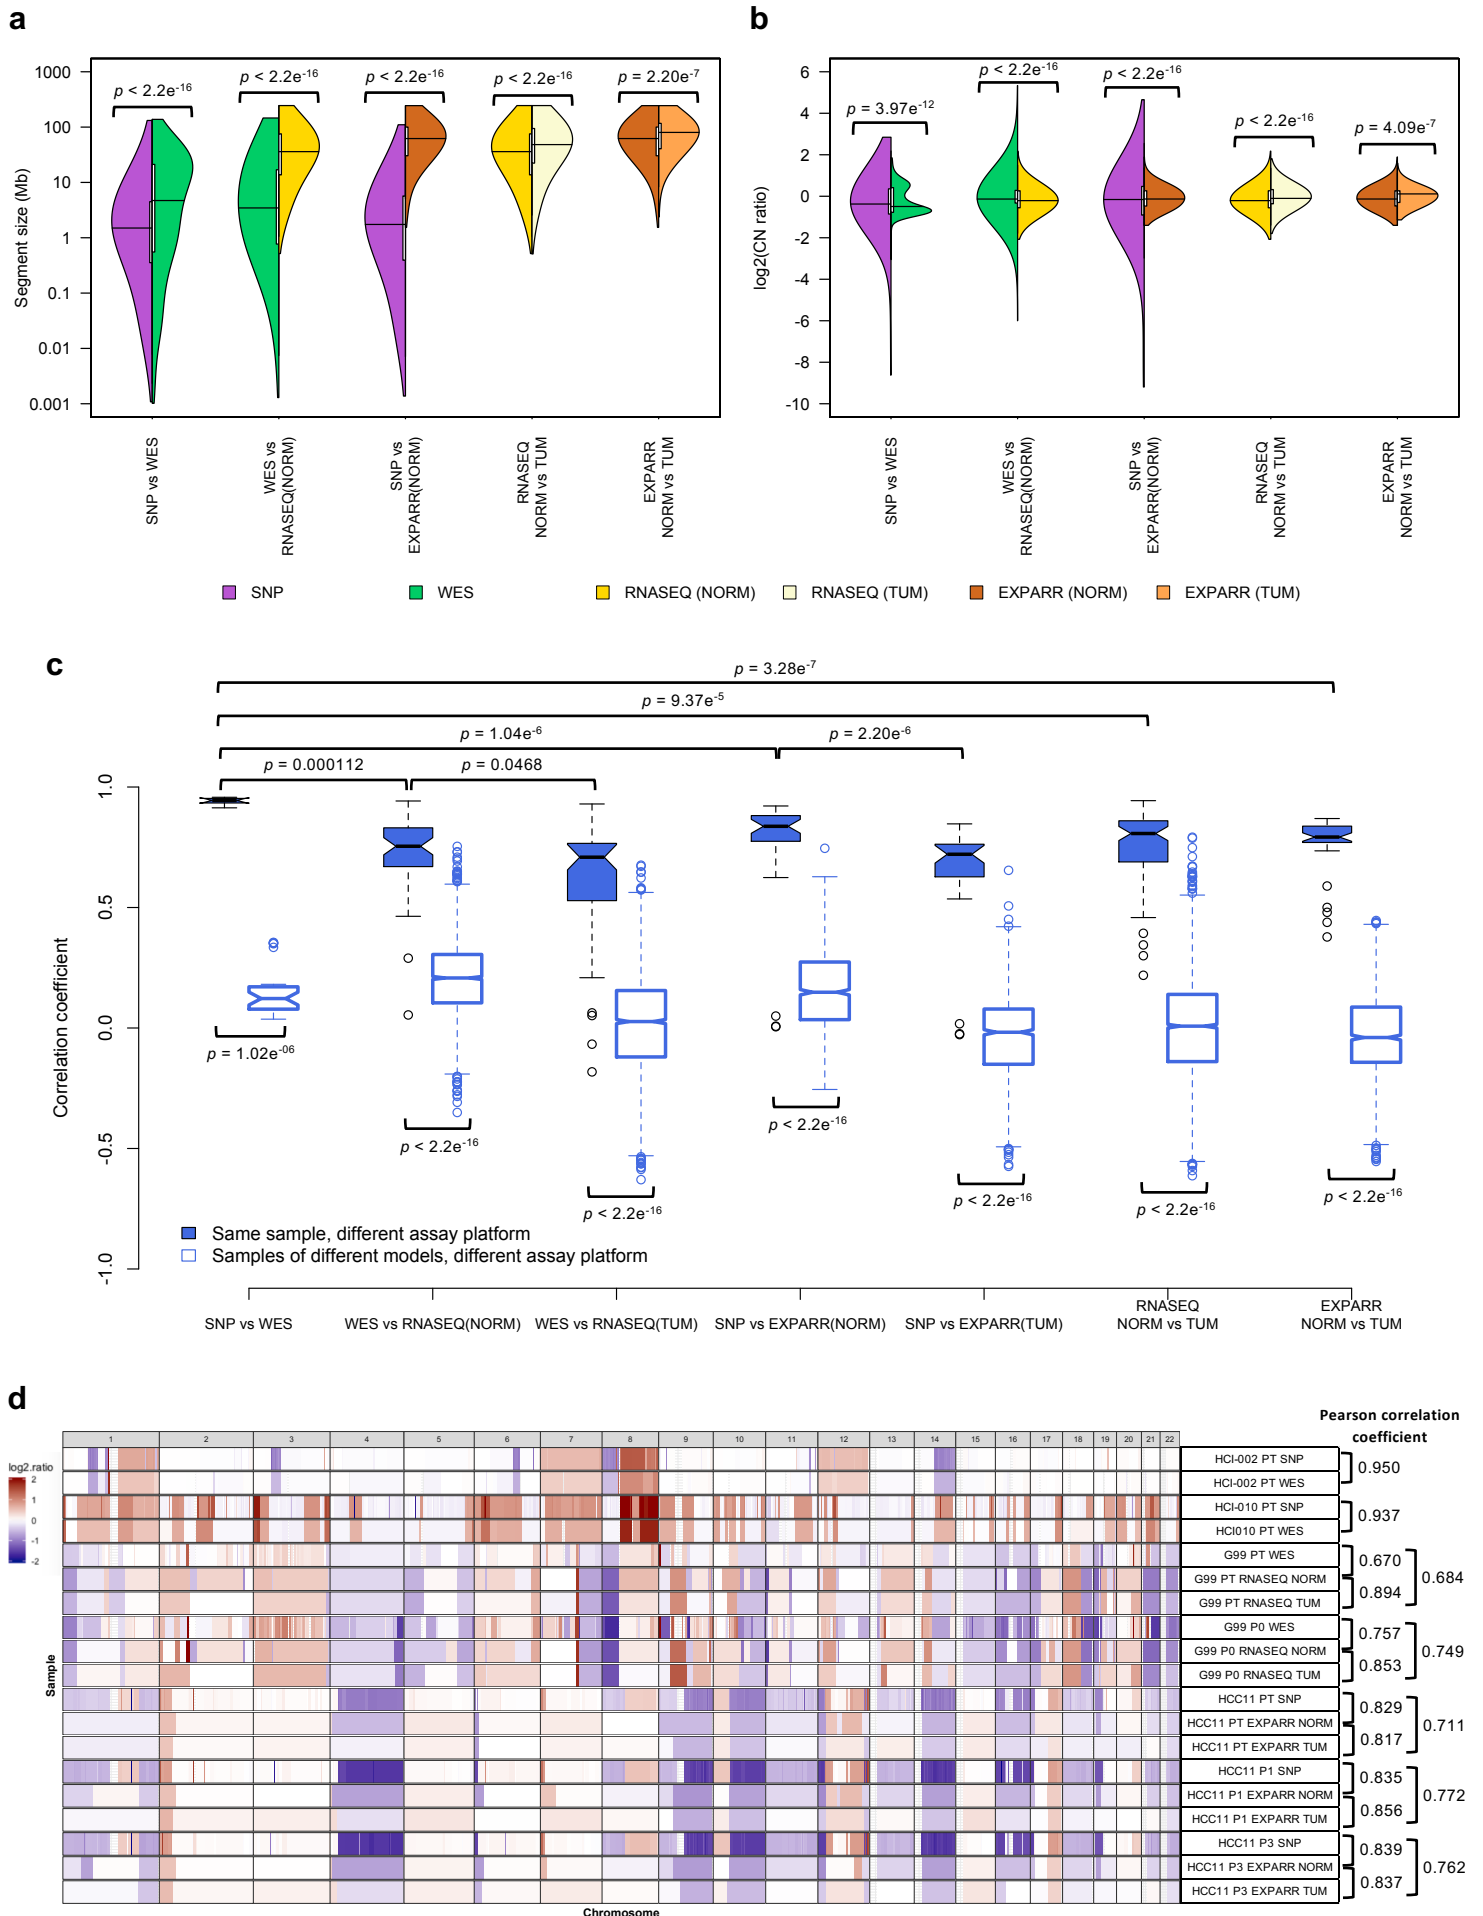

Figure 2.

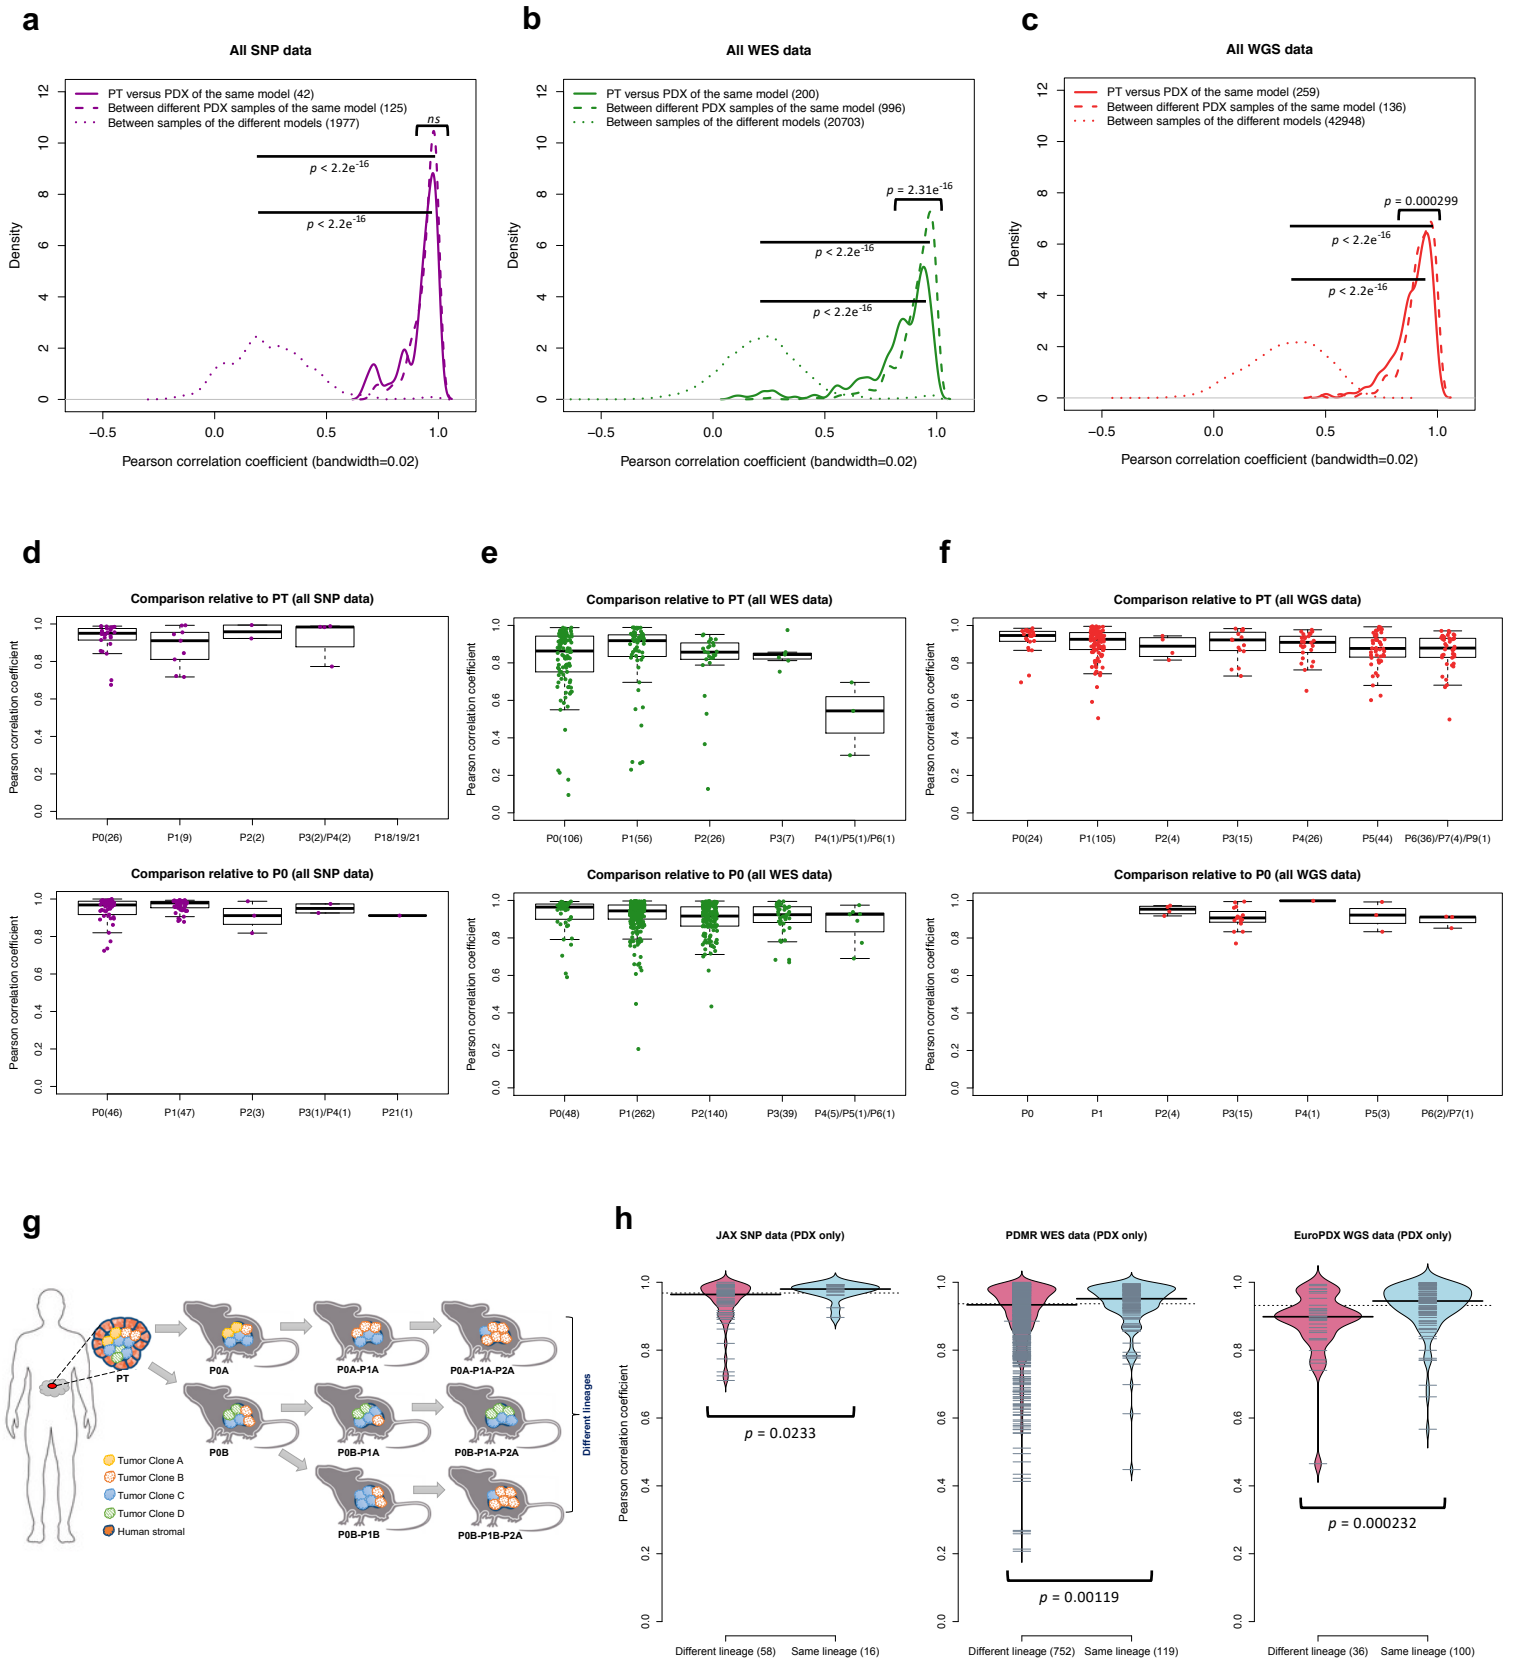

**Figure 3.**

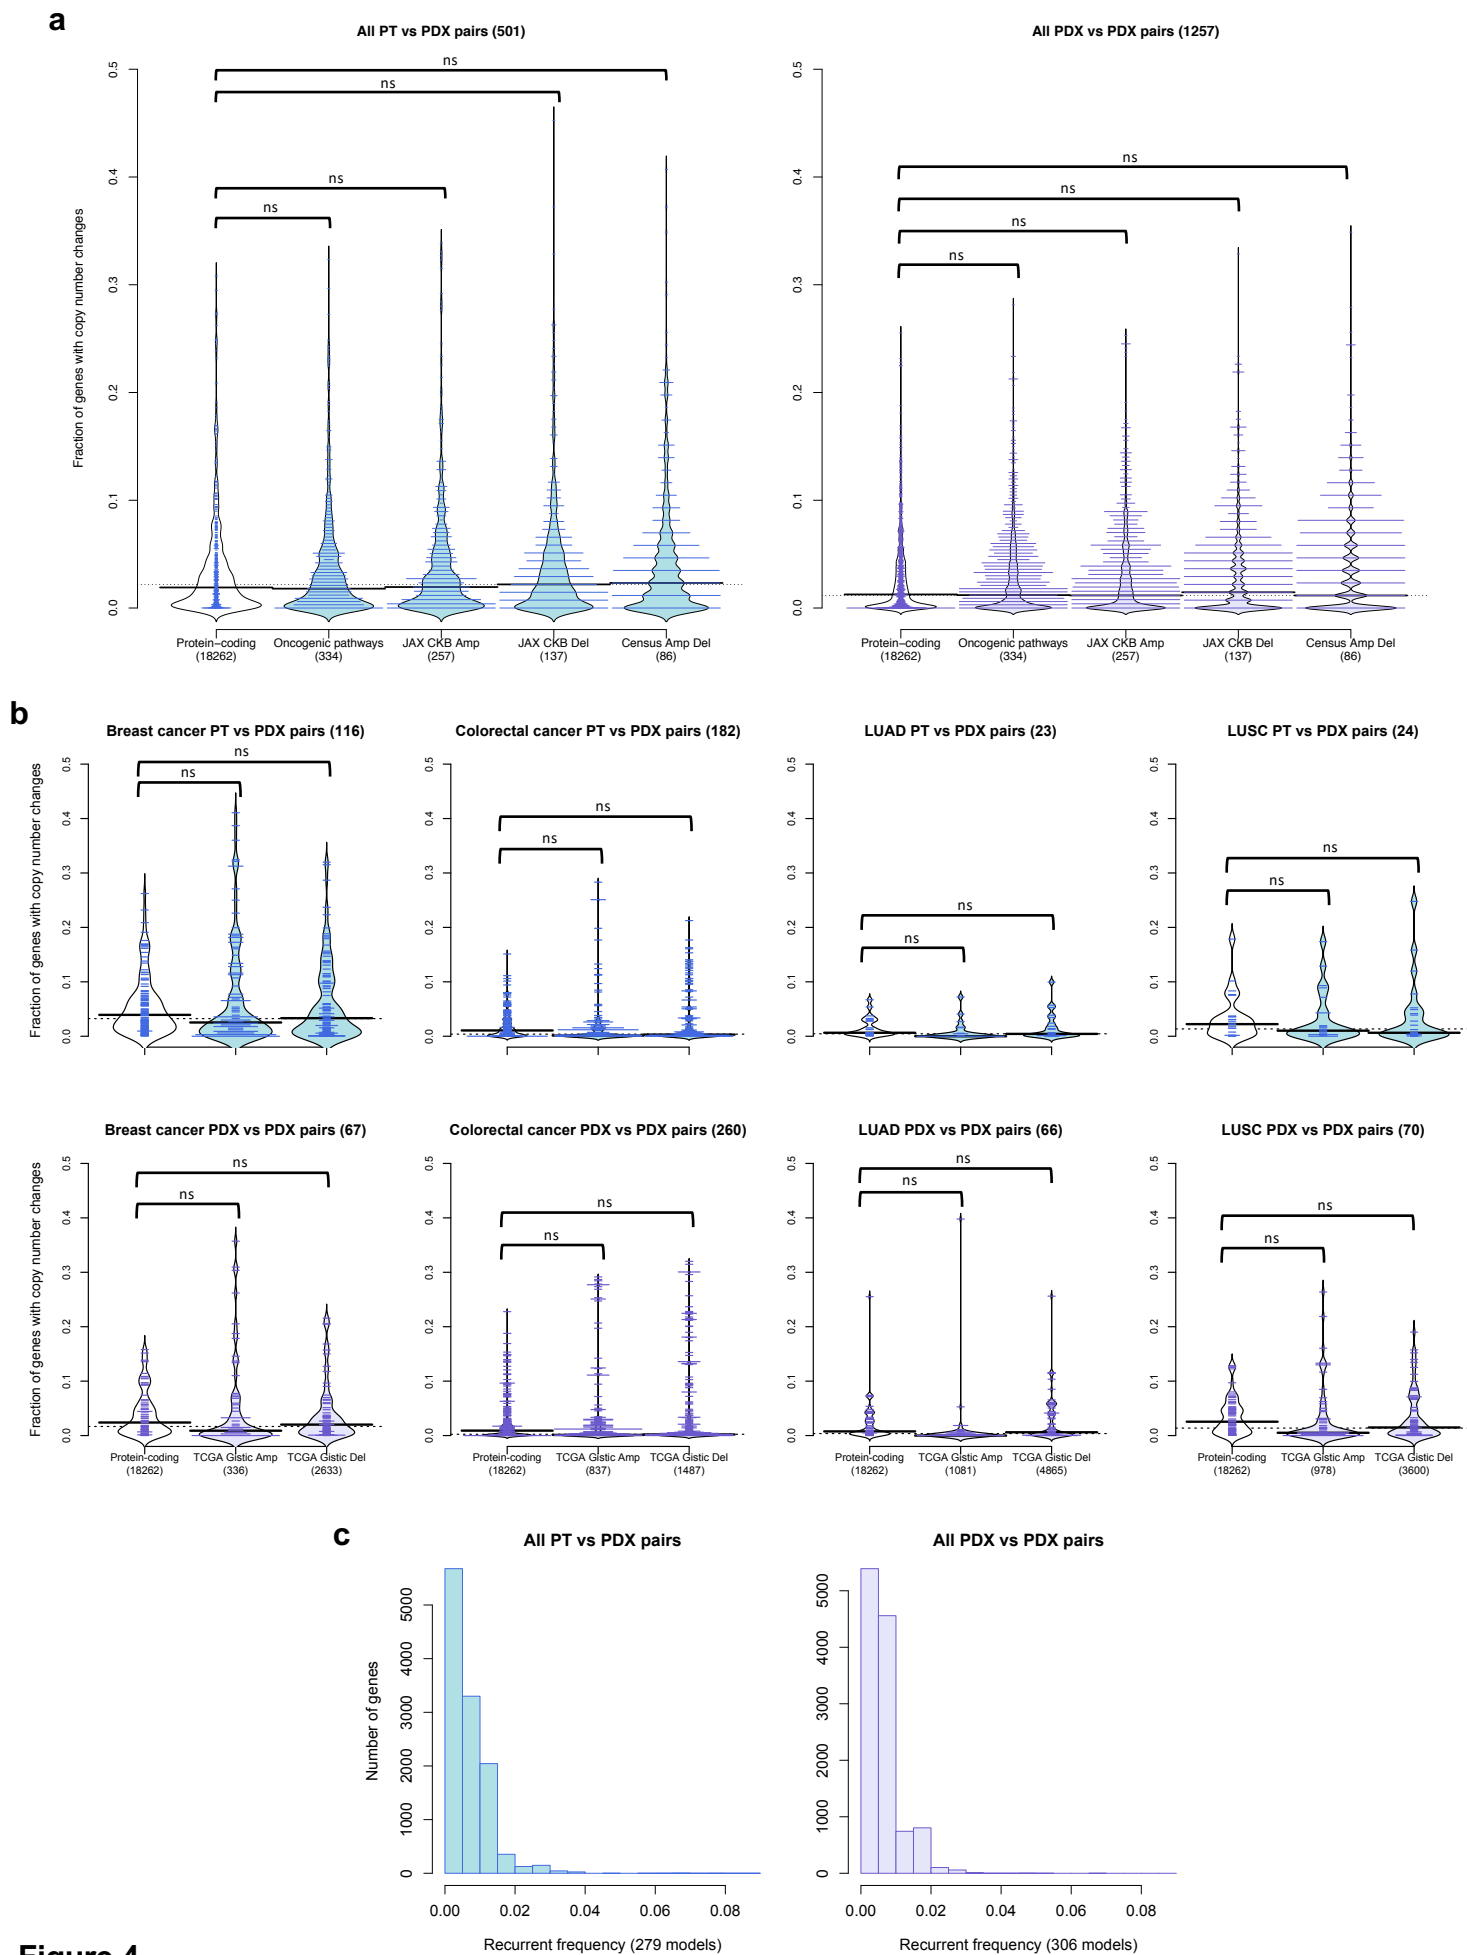

**Figure 4.**

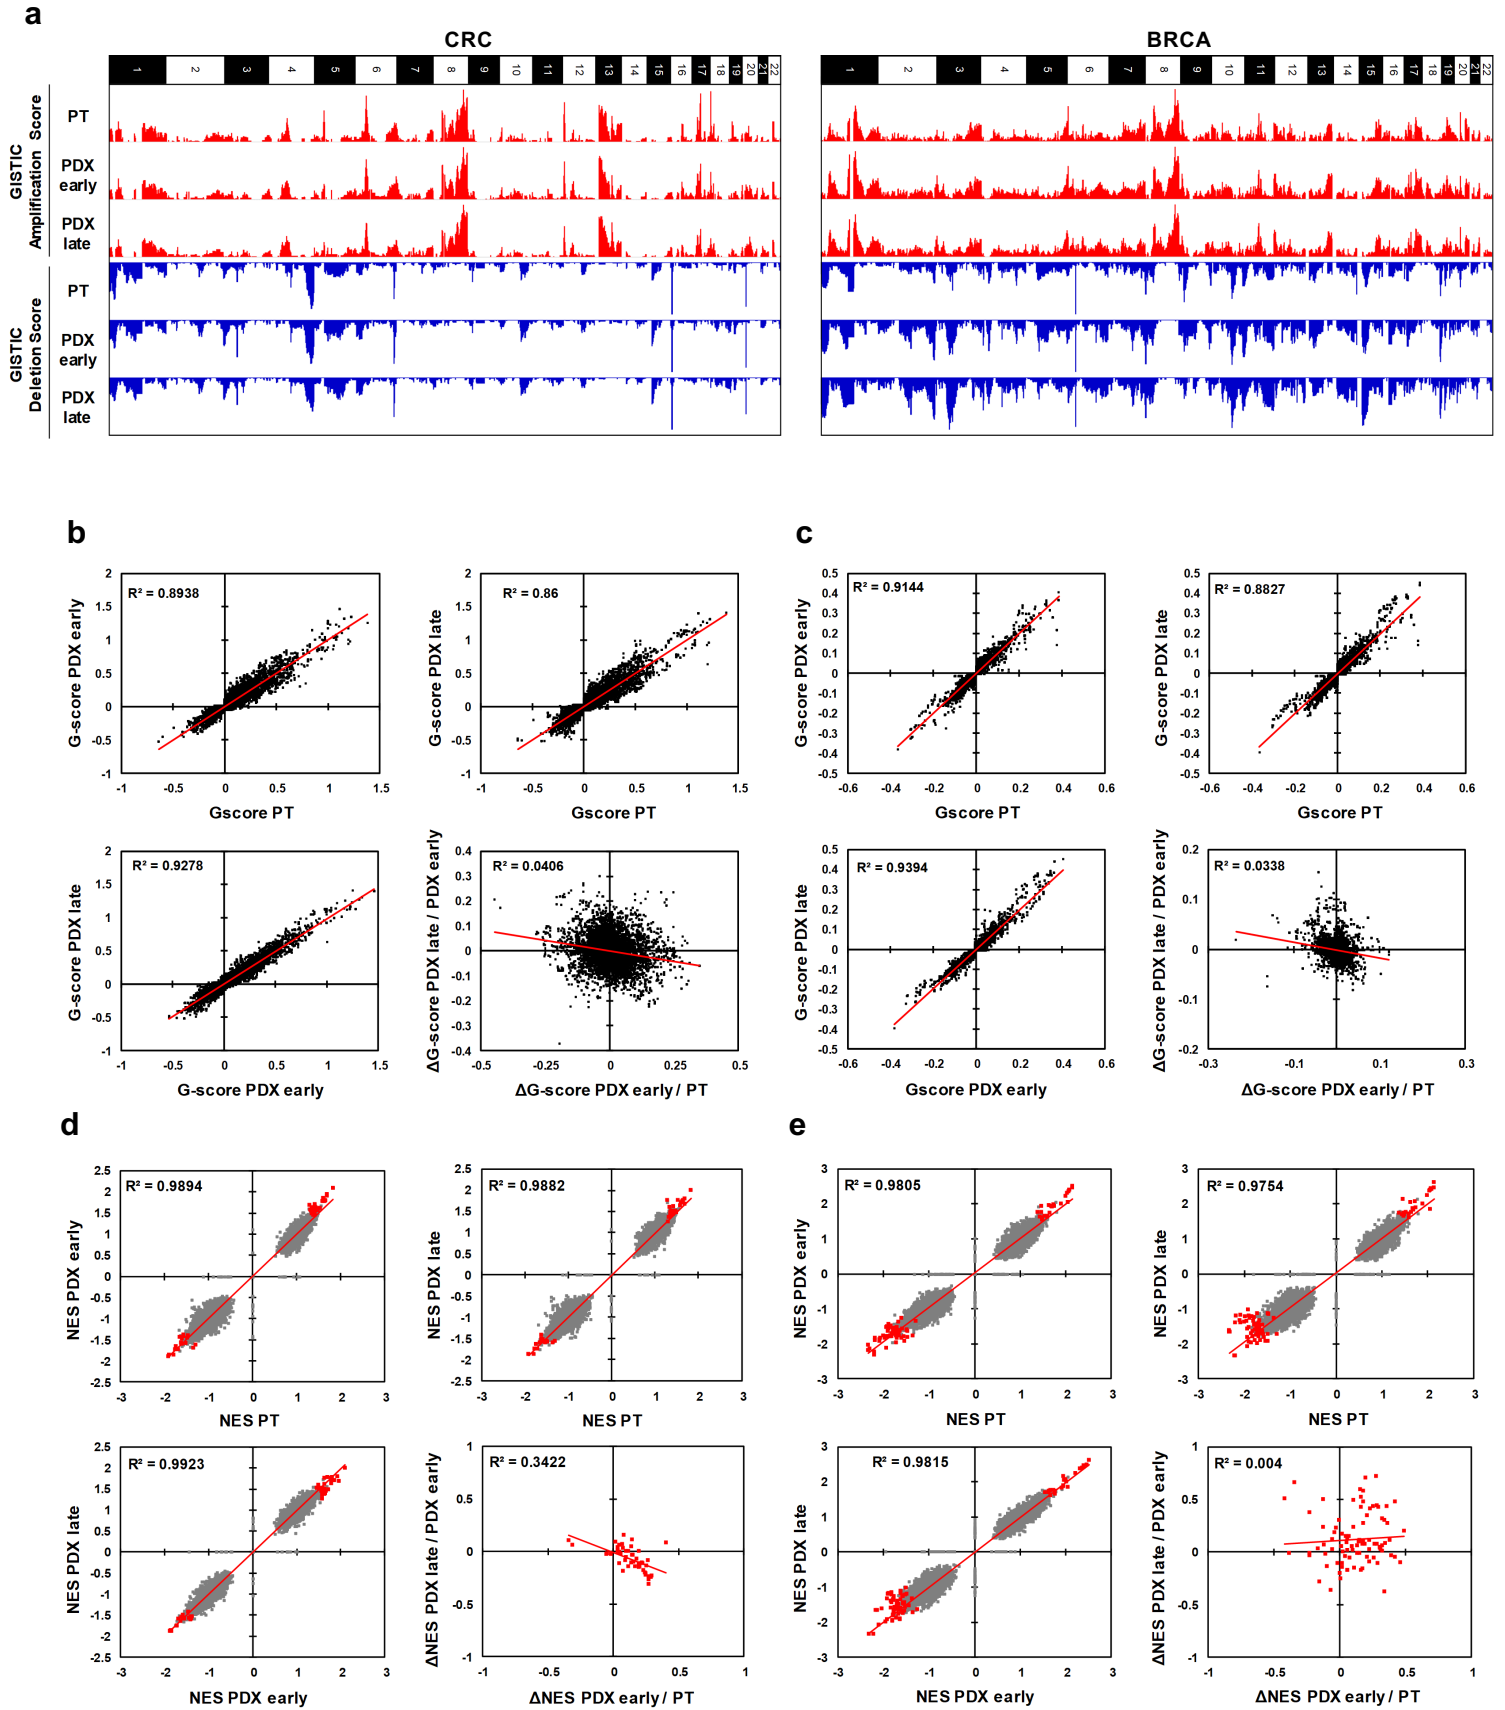

**Figure 5.**

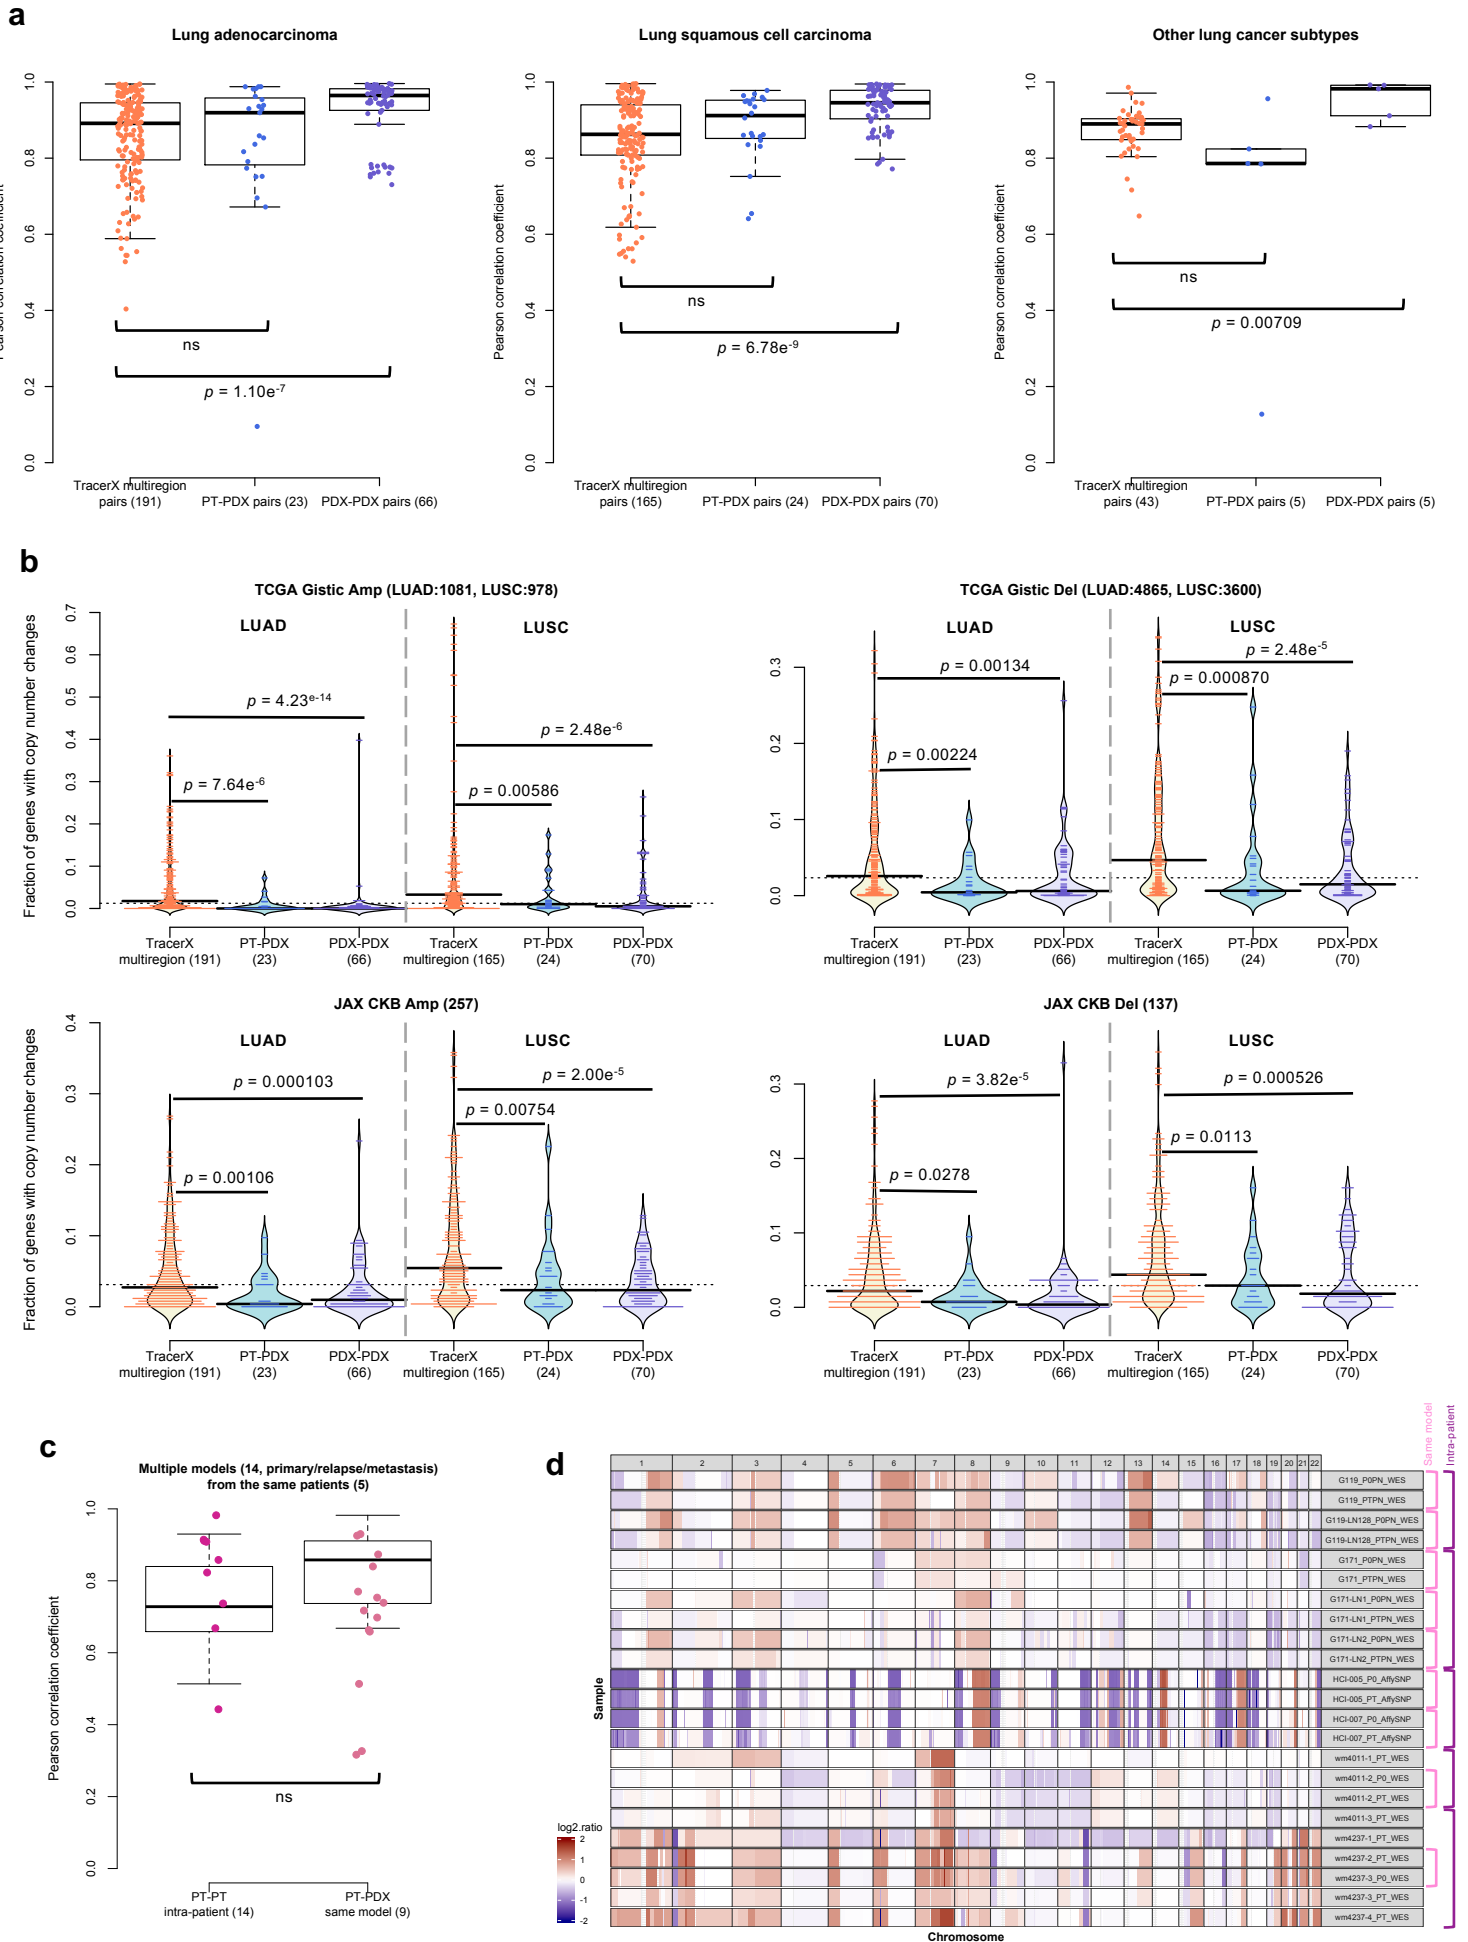

**Figure 6.**

## 1 ONLINE METHODS

### 2 3 **Experimental details for sample collection, PDX engraftment and passaging, and array or** 4 **sequencing.**

5 The tumor types and patient tumor (PT) and patient derived xenograft (PDX) samples contributed  
6 by various centers are summarized in Supplementary Fig. 1-12 and Supplementary Table 1. The  
7 sample collection, PDX engraftment and passaging, and array and sequencing methodologies by  
8 the various centers are described below.

9 ***The Jackson Laboratory (JAX).*** Patient tumor engraftment and PDX passaging of various tumor  
10 types were performed as previously described<sup>1-3</sup>. Detailed information of the PDX models can be  
11 found in the PDX model search form in Mouse Tumor Biology Database (MTB,  
12 <http://tumor.informatics.jax.org/mtbwi/pdxSearch.do>). SNP array samples were genotyped with  
13 the Affymetrix Genome-Wide Human SNP Array 6.0 as described in Woo et al<sup>3</sup>. Whole-exome  
14 sequencing were processed as follows: DNA was isolated from tumor and blood samples using  
15 the Wizard Genomic DNA Purification Kit (Promega) according to the manufacturer's protocols.  
16 DNA quality was assessed using an E-Gel General Purpose Agarose Gel, 0.8% (Invitrogen) and  
17 Nanodrop 2000 spectrophotometer (Thermo Scientific). DNA concentration was determined using  
18 a Qubit dsDNA BR Assay Kit (Thermo Scientific). Libraries were prepared by the Genome  
19 Technologies core facility at The Jackson Laboratory using SureSelectXT Reagents and  
20 SureSelectXT Human All Exon V4 Target Enrichment System (Agilent Technologies), according  
21 to the manufacturer's instructions. Briefly, the protocol entails shearing the DNA using the Covaris  
22 E220 Focused-ultrasonicator (Covaris), ligating Illumina specific adapters, and PCR amplification.  
23 Amplified DNA libraries are then hybridized to the Human All Exon probes, amplified using  
24 indexed primers, and checked for quality and concentration using the DNA High-Sensitivity  
25 LabChip assay (Agilent Technologies) and quantitative PCR (KAPA Biosystems), according to  
26 the manufacturers' instructions. Libraries were sequenced on a HiSeq 2500 100bp paired-end  
27 flow cell using TruSeq Rapid SBS reagents (Illumina). Average coverage for normal samples was  
28 154.38x (115.13 min – 212.31 max), and was 232.10x for tumor samples (161.48 min – 280.65  
29 max).

30 ***Seoul National University-Jackson Laboratory (SNU-JAX).*** Gastric cancer tissues, paired  
31 normal gastric tissues, and blood samples were obtained from individuals who underwent  
32 gastrectomies at the Hospital of Seoul National University from 2014 to 2016. All samples were  
33 obtained with informed consent at the Hospital of Seoul National University, and the institutional  
34 review board approved the study per the Declaration of Helsinki. These samples were stored into



35 RPMI media with 1% penicillin/streptomycin immediately after resected from patients and shipped  
36 using specimen ice box to the laboratory within half an hour. Gastric cancer samples were divided  
37 into several small pieces (2mm × 2mm) and used to generate PDX models and for genomic  
38 analysis. Mice were cared for according to institutional guidelines of the Institutional Animal Care  
39 and Use Committee of the Seoul National University (no. 14-0016-C0A0). For PDX models,  
40 surgically resected tissues were minced into pieces approximately ~2 mm in size and injected  
41 into the subcutaneous area in the flanks of 6-week-old NOD/SCID/IL-2 $\gamma$ -receptor null female mice  
42 (NSG<sup>TM</sup> mice, Jackson Laboratory, Bar Harbor, ME). The volume of tumors and body weight of  
43 mice were checked once or twice a week. The volume was calculated as (tumor length x tumor  
44 width<sup>2</sup>) / 2. When a tumor reached >700~1000 mm<sup>3</sup>, the mouse was sacrificed, and tumor tissues  
45 were stored. Tumor tissues were divided and stored for several purposes: (1) Tumor tissues were  
46 cryopreserved in liquid nitrogen and stored at -80 °C for generating next passage PDXs. (2)  
47 Tumor tissues were frozen in liquid nitrogen for genomic analysis. Whole-exome sequencing was  
48 conducted as follows: Genomic DNA (gDNA) was extracted from blood and tissues using DNeasy  
49 blood and tissue kit (QIAGEN) and checked for purity, concentration, and integrity by OD260/280  
50 ratio using NanoDrop Instruments (NanoDrop Technologies, Wilmington, DE, USA) and agarose  
51 gel electrophoresis. DNA was sheared by fragmentation by Bioruptor (Diagenode, Inc., Denville,  
52 NJ, USA) and purified using Agencourt AMPure XP beads (Beckman Coulter, Fullerton, CA,  
53 USA). DNA samples were then tested for size distribution and concentration using an Agilent  
54 Bioanalyzer 2100. Standard protocols were utilized for adaptor ligation, indexing, high-fidelity  
55 PCR amplification. Subsequently, exome enrichment was performed by hybrid capture with the  
56 All Exon v5 capture library. Capture libraries were amplified, pooled, and submitted to the  
57 commercial sequencing company (Macrogen) for 100bp paired-end, multiplex sequencing on a  
58 HiSeq 2000 sequencing system. Average coverage for normal samples was 62.67x (38.97 min –  
59 108.77 max), and was 102.35x for tumor samples (36.02 min – 150.49 max). RNA-Sequencing  
60 data was generated as follows: RNA was extracted from tissues using the RNeasy Mini Kit  
61 (Qiagen, Valencia, CA, USA). RNA-Sequencing libraries were prepared from 1  $\mu$ g total RNA using  
62 the TruSeq RNA Sample Preparation v2 Kit (Illumina, San Diego, CA) according to the  
63 manufacturer's protocol. Libraries were submitted to the commercial sequencing company  
64 (Macrogen) for 100bp paired-end, multiplex sequencing on a HiSeq 2000 sequencer.

65 **Huntsman Cancer Institute (HCI).** Patient tumor engraftment and PDX passaging of breast  
66 cancer samples were performed as previously described<sup>4,5</sup>. SNP array samples were genotyped  
67 by the Affymetrix SNP 6.0 array for profiling. These samples were processed, according to  
68 DeRose et al<sup>5</sup>. Additionally, some samples, were also processed using the Illumina Infinium Omni

69 2.5 Exome-8 v1.3 Beadchip array. Hybridized arrays were scanned using an Illumina iScan  
70 instrument following the Illumina Infinium LCG Assay Manual Protocol and processed using  
71 GenomeStudio. When samples had both Affymetrix and Illumina chips, we deferred to Illumina  
72 intensity values for copy number calling. Whole-exome sequencing was conducted as follows:  
73 Agilent SureSelectXT Human All Exon V6+COSMIC or Agilent Human All Exon 50Mb library  
74 preparation protocols were used with inputs of 100-3000ng sheared genomic DNA (Covaris).  
75 Library construction was performed using the Agilent Technologies SureSelectXT Reagent Kit.  
76 The concentration of the amplified library was measured using a Qubit dsDNA HS Assay Kit  
77 (ThermoFisher Scientific). Amplified libraries (750 ng) were enriched for exonic regions using  
78 either the Agilent Technologies SureSelectXT Human All Exon v6+COSMIC or Agilent Human All  
79 Exon 50Mb kits and PCR amplified. Enriched libraries were qualified on an Agilent Technologies  
80 2200 TapeStation using a High Sensitivity D1000 ScreenTape assay and the molarity of adapter-  
81 modified molecules was defined by quantitative PCR using the Kapa Biosystems Kapa Library  
82 Quant Kit. The molarity of individual libraries was normalized to 5 nM, and equal volumes were  
83 pooled in preparation for Illumina sequence analysis. Sequencing libraries (25 pM) were  
84 chemically denatured and applied to an Illumina HiSeq v4 paired-end flow cell using an Illumina  
85 cBot. Hybridized molecules were clonally amplified and annealed to sequencing primers with  
86 reagents from an Illumina HiSeq PE Cluster Kit v4-cBot (PE-401-4001). Following the transfer of  
87 the flowcell to an Illumina HiSeq 2500 instrument (HCS v2.2.38 and RTA v1.18.61), a 125-cycle  
88 paired-end sequence run was performed using HiSeq SBS Kit v4 sequencing reagents (FC-401-  
89 4003). Average coverage for normal samples was 90.22x (15.28 min – 131.69 max), and was  
90 96.66x for tumor samples (10.65 min – 166.06 max).

91 ***Baylor College of Medicine (BCM)***. Patient tumor engraftment and PDX passaging of breast  
92 cancer samples were performed as previously described<sup>6,7</sup>. SNP array samples were genotyped  
93 at Huntsman Cancer Institute using the Illumina Infinium Omni 2.5Exome-8 v1.4 Beadchip array  
94 by the procedures provided in the HCI section above.

95 ***The University of Texas MD Anderson Cancer Center (MDACC)***. Fresh non-small-cell lung  
96 carcinoma tumor samples were collected from surgically resected specimens with the informed  
97 consent of the patients. Generation and passaging of PDXs, and histological analysis and DNA  
98 fingerprint assay for PDXs and their primary tumor tissues were performed as previously  
99 described<sup>8</sup>. The protocols for the use of clinical specimens and data in this study were approved  
100 by the Institutional Review Board at The University of Texas MD Anderson Cancer Center. All  
101 animal studies were carried out in accordance with the Guidelines for the Care and Use of  
102 Laboratory Animals (National Institutes of Health Publication 85-23) and the institutional

103 guidelines of MDACC. Whole-exome sequencing was conducted at the Sequencing and  
104 Microarray Core Facility at MD Anderson Cancer Center as follows: Genomic DNA was quantified  
105 and quality was assessed using Picogreen (Invitrogen) and Genomic DNA Tape for the 2200  
106 TapeStation (Agilent), respectively. DNA from each sample (100-500 ng of genomic DNA) was  
107 sheared by sonication and then used for library preparation by using KAPA library preparation kit  
108 (KAPA) following manufacturer's instruction. Equimolar amounts of DNA were pooled (2-6  
109 samples per pool) and whole exome regions were captured by using biotin labeled probes from  
110 Roche Nimblegen (Exome V3) followed manufacture's protocol. The captured libraries were  
111 sequenced on a HiSeq 2000 with 100bp paired-end (Illumina Inc., San Diego, CA, USA) on a  
112 paired-end flowcell. Average coverage for normal samples was 85.61x (40.80 min – 228.41 max),  
113 and was 125.79x for tumor samples (25.12 min – 251.53 max).

114 **The WISTAR Institute (WISTAR).** Tumor biopsy samples were collected according to IRB-  
115 approved protocol with the informed written consent of the patients. Collected fresh tumor pieces  
116 were snap frozen and stored at -80 °C. Subcutaneous implantation into NSG SCID mice were  
117 used to create PDX models. BRAF inhibitor treatment (PLX) was administered as PLX4720  
118 200ppm chemical additive diet chow (Research Diets, New Brunswick, NJ). Whole exome  
119 sequencing was conducted as follows: Genome DNA extraction was done using Qiagen DNeasy  
120 Blood & Tissue Kit, and libraries for whole exome sequencing were performed using Nextera DNA  
121 exome kit. Capture libraries were amplified, pooled, and then sequenced on an Illumina HiSeq  
122 2500 76bp paired-end run. Average coverage for normal samples was 97.50x (71.46 min – 124.64  
123 max), and was 208.27x for tumor samples (146.88 min – 281.20 max).

124 **National Cancer Institute Patient-Derived Models Repository (PDMR).** For engraftments,  
125 tumor material plus a drop of Matrigel (BD BioSciences, Bedford, MA) were implanted  
126 subcutaneously in NSG<sup>TM</sup> mouse model NOD.Cg-Prkdc<sup>scid</sup> Il2rg<sup>tm1Wjl</sup>/SzJ. Mice were housed in  
127 sterile, filter-capped polycarbonate cages, maintained in a barrier facility on a 12-hour light/dark  
128 cycle, and were provided sterilized food and water, ad libitum. Animals were monitored weekly  
129 for tumor growth. The initial passage of material was grown to approximately 1000-2000mm<sup>3</sup>  
130 calculated using the following formula: weight (mg) = (tumor length x [tumor width]<sup>2</sup>) / 2. Tumor  
131 material was then harvested, a portion cryopreserved, and the remainder implanted into NSG  
132 host mice. Every PDX tumor harvested and cryopreserved also has 2-3 fragments snap frozen  
133 for next generation sequence analysis and short tandem repeat validation and a piece is fixed in  
134 neutral buffered formalin and then embedded in paraffin for histological assessment. Related  
135 patient data, clinical history, representative histology and short-tandem repeat profiles for the PDX  
136 models can be found at <https://pdmr.cancer.gov>. Full PDMR standard operating procedures for

137 tumor engraftment and PDX passaging are available at <https://pdmr.cancer.gov/sops>. Whole-  
138 exome sequencing data were generated with the Agilent SureSelect capture kit, and sequenced  
139 with 125bp pair-end Illumina HiSeq 2500 runs following standard operating procedures available  
140 here: <https://pdmr.cancer.gov/sops>. Average coverage for normal samples was 148.47x (50.95  
141 min – 242.24 max), and was 174.77x for tumor samples (81.41 min – 403.22 max).

142 **Washington University in St. Louis (WUSTL)**. All human tissues acquired for these  
143 experiments were processed in compliance with NIH regulations and institutional guidelines,  
144 approved by the Institutional Review Board at Washington University. Tumors from all patients  
145 were obtained via core needle biopsy, skin punch biopsy, or surgical resection after informed  
146 consent. All animal procedures were reviewed and approved by the Institutional Animal Care and  
147 Use Committee at Washington University in St. Louis. Pancreatic cancer models were derived  
148 from tissue fragments implanted subcutaneously into dorsal flank regions of non-humanized,  
149 female NOD/SCID/ $\gamma$  mice (Jackson Laboratory, Bar Harbor, ME) using Matrigel. The sample  
150 tissues for these PDX models were obtained from archived, cryopreserved PDX harvests. Final  
151 tumor passages in mice were kept cold and harvested into RPMI-1640 with antibiotic and  
152 antimycotic additives. Pieces of each tumor were processed into the following: flash frozen tissue  
153 fragments, OCT blocks and matched Haematoxylin and Eosin (H&E) slides, formalin fixed paraffin  
154 blocks and matched H&E slides, RNAlater tissue storage, and cryopreserved fragments (FBS +  
155 10% DMSO). A minimum of 250 mg of flash frozen material was submitted to the Siteman Cancer  
156 Center's Proteomics Core. The tissues were cryo-pulverized and subsequently divided for DNA  
157 and RNA preparation, and long-term storage. Patient tumors were obtained directly from  
158 operating rooms and placed into sterile collection media (RPMI-1640 with antibiotic and  
159 antimycotic additives). Pieces of each tumor were processed into the following: flash frozen tissue  
160 fragments, OCT blocks and matched H&E slides, formalin fixed paraffin blocks and matched H&E  
161 slides, and cryopreserved fragments (FBS + 10% DMSO). Parental genomic DNA was prepared  
162 from OCT blocks if available, and if not available, paraffin blocks were utilized. In addition,  
163 genomic DNA for sequencing control was prepped from peripheral blood mononuclear cells that  
164 were both procured and processed at time of surgery. Breast cancer models were derived from  
165 tissue fragments implanted subcutaneously into dorsal flank regions of non-humanized,  
166 NOD/SCID/ $\gamma$  mice (Jackson Laboratories, Bar Harbor, ME) as previously described<sup>7,9</sup>. Whole-  
167 exome sequencing was conducted as follows: Libraries were constructed using unamplified  
168 genomic DNA (minimum 100 ng) from blood (normal), tumor, and xenograft samples. Exons were  
169 captured via IDT Exome library kit followed by high-throughput sequencing on an Illumina  
170 NovaSeq S4 platform (Illumina Inc., San Diego, CA) using 150bp paired-end reads. Details of

171 whole exome library construction have been given elsewhere (Fisher, Barry et al. 2011). Average  
172 coverage for normal pancreatic cancer samples was 85.73x (55.65 min – 108.91 max), and was  
173 124.01x (49.68 min – 242.35 max) for tumor pancreatic cancer samples. Average coverage for  
174 normal breast cancer samples was 58.33x (45.37 min – 70.30 max), and was 89.90x (17.24 min  
175 – 149.53 max) for tumor breast cancer samples.

176 **Shanghai Institute for Biological Sciences (SIBS)**. Gene expression and copy number data,  
177 generated by the Affymetrix Human Genome U133 Plus 2.0 Array and Affymetrix Human SNP  
178 6.0 platforms respectively, of hepatocellular carcinoma (HCC) PDX models were retrieved from  
179 the Gene Expression Omnibus (GEO) accession ID GSE90653<sup>10</sup>. Expression microarray data  
180 generated by the Affymetrix Human Genome U133 Plus 2.0 Array for normal liver were  
181 downloaded from GEO and ArrayExpress: GSE3526<sup>11</sup>, GSE33006<sup>12</sup> and E-MTAB-1503-3<sup>13</sup>.

182 **EurOPDX colorectal cancer (EuroPDX CRC)**. Liver-metastatic colorectal cancer samples were  
183 obtained from surgical resection of liver metastases at the Candiolo Cancer Institute, the  
184 Maurizio Umberto I Hospital, and the San Giovanni Battista Hospital. Informed consent for  
185 research use was obtained from all patients at the enrolling institution before tissue banking, and  
186 study approval was obtained from the ethics committees of the three centers. Tissue from hepatic  
187 metastasectomy in affected individuals was fragmented and either frozen or prepared for  
188 implantation as described previously<sup>14,15</sup>. Non-obese diabetic/severe combined immunodeficient  
189 (NOD/SCID) female mice (4–6 weeks old) were used for tumor implantation. Snap-frozen aliquots  
190 were obtained from surgical specimens and corresponding tumor grafts at different passages.  
191 Whole genome sequencing was conducted as follows: DNA was extracted using Maxwell RSC  
192 Blood DNA kit (Promega AS1400) from colorectal cancer liver metastasis and corresponding  
193 tumor grafts at different passages. Genomic DNA was fragmented and used for Illumina TruSeq  
194 library construction (Illumina) according to the manufacturer's instructions. Libraries were then  
195 purified with Qiagen MinElute column purification kit and eluted in 17 µl of 70°C EB to obtain 15  
196 µl of DNA library. The libraries were sequenced on HiSeq4000 (Illumina) with single-end reads of  
197 51bp at low coverage (~0.1x genome coverage on average).

198 **EurOPDX breast cancer (EuroPDX BRCA)**. Human breast tumors were obtained from surgical  
199 resections at the Netherland Cancer Institute (NKI), Institut Curie (IC) and Vall d'Hebron Institute  
200 of Oncology (VHIO). Engraftment was conducted with different procedures at each center. NKI:  
201 Small tumor fragments (2mm diameter) were implanted into the 4th mammary fat pad of 8-week-  
202 old Swiss female nude mice. Mice were checked for tumor appearance once a week, and  
203 supplemented with estrogen, if the tumor was ER positive. After palpable tumor detection, tumor  
204 size was measured twice a week. When tumors reached a size of 700-1000 mm<sup>3</sup>, animals were

205 sacrificed and tumors were explanted and subdivided in fragments for serial transplantation as  
206 described above, or for frozen vital storage in liquid nitrogen. IC: Breast cancer fragments were  
207 obtained from patients at the time of surgery, with informed written patient consent. Fragments of  
208 30 to 60 mm<sup>3</sup> were grafted into the interscapular fat pad of 8 to 12-week-old female Swiss nude  
209 mice. Mice were supplemented with estrogen. Xenografts appeared at the graft site 2 to 8 months  
210 after grafting. When tumors were close to 1500 mm<sup>3</sup>, they were subsequently transplanted from  
211 mouse to mouse and stocked frozen in DMSO-fetal calf serum (FCS) solution or frozen dried in  
212 nitrogen. Fragment fixed tissues in phosphate buffered saline (PBS) 10% formol for histologic  
213 studies were also stored. The experimental protocol and animal housing were in accordance with  
214 institutional guidelines as proposed by the French Ethics Committee (Agreement B75-05-18,  
215 France). VHIO: Fresh tumor samples from patients with breast cancer were collected for  
216 implantation following an institutional IRB-approved protocol and the associated informed  
217 consent, or by the National Research Ethics Service, Cambridgeshire 2 REC (REC reference  
218 number: 08/H0308/178). Experiments were conducted following the European Union's animal  
219 care directive (2010/63/EU) and were approved by the Ethical Committee of Animal  
220 Experimentation of the Vall d'Hebron Research Institute. Surgical or biopsy specimens from  
221 primary tumors or metastatic lesions were immediately implanted in mice. Fragments of 30 to 60  
222 mm<sup>3</sup> were implanted into the mammary fat pad (surgery samples) or the lower flank (metastatic  
223 samples) of 6-week-old female athymic HsdCpb:NMRI-Foxn1nu mice (Harlan Laboratories).  
224 Animals were continuously supplemented with estradiol. Upon growth of the engrafted tumors,  
225 the model was perpetuated by serial transplantation onto the lower flank. Tumor growth was  
226 measured with caliper bi-weekly. In all experiments, mouse weight was recorded twice weekly.  
227 When tumors reached 1500 mm<sup>3</sup>, mice were euthanized and tumors were explanted. Whole  
228 genome sequencing was conducted as follows: genomic DNA was extracted from breast cancers  
229 and corresponding PDXs using (i) QIAamp DNA Mini Kit s(50) (#51304, Qiagen) (IC) or (ii)  
230 according to Laird PW's protocol<sup>16</sup> (NKI and VHIO). The amount of double stranded DNA in the  
231 genomic DNA samples was quantified by using the Qubit® dsDNA HS Assay Kit (Invitrogen, cat  
232 no Q32851). Up to 2000 ng of double stranded genomic DNA were fragmented by Covaris  
233 shearing to obtain fragment sizes of 160-180bp. Samples were purified using 1.6X Agencourt  
234 AMPure XP PCR Purification beads according to manufacturer's instructions (Beckman Coulter,  
235 cat no A63881). The sheared DNA samples were quantified and qualified on a BioAnalyzer  
236 system using the DNA7500 assay kit (Agilent Technologies cat no. 5067-1506). With an input of  
237 maximum 1 µg sheared DNA, library preparation for Illumina sequencing was performed using  
238 the KAPA HTP Library Preparation Kit (KAPA Biosystems, KK8234). During library enrichment,



239 4-6 PCR cycles were used to obtain enough yield for sequencing. After library preparation the  
240 libraries were cleaned up using 1X AMPure XP beads. All DNA libraries were analyzed on the GX  
241 Caliper (a PerkinElmer company) using the HT DNA High Sensitivity LabChip, for determining the  
242 molarity. Up to two pools of 24 uniquely indexed samples and one pool of 81 uniquely indexed  
243 samples were mixed together by equimolar pooling in a final concentration of 10nM, and  
244 subjected to sequencing on an Illumina HiSeq2500 machine in a total of 12 lanes of a single read  
245 65bp run at low coverage (~0.4x genome coverage on average), according to manufacturer's  
246 instructions.

247

### 248 **Consolidating tumor types from different datasets**

249 As the terminology of tumor types/subtypes by the different contributing centers were not  
250 consistent, we used the Disease Ontology database<sup>17</sup> (<http://disease-ontology.org/>), cancer types  
251 listed in NCI website (<https://www.cancer.gov/types>) and in TCGA publications<sup>18,19</sup> to unify and  
252 group the tumor types/subtypes under broader terms as shown in Fig.1 and Supplementary Table  
253 2.

254

### 255 **Copy number alteration (CNA) estimation methods**

256 **SNP array.** The estimation of CNA profiles from SNP array were detailed previously<sup>3</sup>. In short, for  
257 Affymetrix Human SNP 6.0 arrays, PennCNV-Affy and Affymetrix Power Tools<sup>20</sup> were used to  
258 extract the B-allele frequency (BAF) and Log R Ratio (LRR) from the CEL files. Due to the  
259 absence of paired-normal samples, the allele-specific signal intensity for each PDX tumor were  
260 normalized relative to 300 randomly selected sex-matched Affymetrix Human SNP 6.0 array CEL  
261 files obtained from the International HapMap project<sup>21</sup>. For Illumina Infinium Omni2.5Exome-8  
262 SNP arrays (v1.3 and v1.4 kit), the Illumina GenomeStudio software was used to extract the B-  
263 allele frequency (BAF) and Log R Ratio (LRR) from the signal intensity of each probe. The single  
264 sample mode of the Illumina GenomeStudio was used, which normalizes the signal intensities of  
265 the probes with an Illumina in-house dataset. The single tumor version of ASCAT<sup>22</sup> (v2.4.3 for  
266 JAX SNP data, v2.5.1 for SIBS SNP data) was used for GC correction, predictions of the  
267 heterozygous germline SNPs based on the SNP array platform, and estimation of ploidy, tumor  
268 content and allele-specific copy number segments. The resultant copy number segments were  
269 annotated with log<sub>2</sub> ratio of total copy number relative to predicted ploidy from ASCAT.

270 **Whole-exome sequencing (WES) data.** All the samples were subjected to quality control  
271 (filtering and trimming of poor-quality reads and bases) using in-house QC script with the cut-off  
272 that half of the read length should be ≥20 in base quality at phred scale. We further removed the

273 known adaptors using cut-adapt<sup>23</sup> v1.15 11 at -m 36. Afterward, we aligned the reads to the  
274 human genome (GRCh38.p5) using bwakit<sup>24</sup> v0.7.15. Engrafted tumor samples were subjected  
275 to the additional step of mouse read removal using Xenome<sup>25</sup> v1.0.0, with default parameters.  
276 The alignment was converted to BAM format using Picard SortSam v2.8.1  
277 (<https://broadinstitute.github.io/picard/>), and duplicates were removed by Picard MarkDuplicates  
278 utility. BaseRecalibrator from the Genome Analysis Tool Kit<sup>26,27</sup> (GATK) v4.0.5.1 was used to  
279 adjust the quality of raw reads. Training files for the base quality scale recalibration were  
280 Mills\_and\_1000G\_gold\_standard.indels.hg38.vcf.gz,  
281 Homo\_sapiens\_assembly38.known\_indels.vcf.gz, and dbSNP v151. Mean target coverage was  
282 determined for each sample by Picard CollectHsMetrics. Aligned bam files were subset to target  
283 region by GATK and SAMTools<sup>28</sup> v0.1.18 was used to generate the pileup for each sample. Pileup  
284 data were used for CNA estimation as calculated with Sequenza<sup>29</sup> v2.1.2. Both tumor and normal  
285 data, that utilized the same capture array, were used as input. pileup2seqz and GC-windows (-w  
286 50) modules from sequenza-utils.py utility were used to create the native seqz format file for  
287 Sequenza and compute the average GC content in sliding windows from hg38 genome,  
288 respectively. Finally, we ran the three Sequenza modules with these modified parameters  
289 (sequenza.extract: assembly = "hg38", sequenza.fit: chromosome.list = 1:23, and  
290 sequenza.results: chromosome.list = 1:23) to estimate the segments of copy number  
291 gains/losses. Finally, segments lacking read counts, in which  $\geq 50\%$  of the segment with zero read  
292 coverage, were removed. A reference implementation of this workflow (Supplementary Fig. 77)  
293 is developed and deployed in the cancer genomics cloud at SevenBridges  
294 ([https://cgc.sbgenomics.com/public/apps#pdxnet/pdx-wf-commit2/wes-cnv-tumor-normal-](https://cgc.sbgenomics.com/public/apps#pdxnet/pdx-wf-commit2/wes-cnv-tumor-normal-workflow/)  
295 [workflow/](https://cgc.sbgenomics.com/public/apps#pdxnet/pdx-wf-commit2/pdx-wes-cnv-xenome-tumor-normal-workflow/), [https://cgc.sbgenomics.com/public/apps#pdxnet/pdx-wf-commit2/pdx-wes-cnv-](https://cgc.sbgenomics.com/public/apps#pdxnet/pdx-wf-commit2/pdx-wes-cnv-xenome-tumor-normal-workflow/)  
296 [xenome-tumor-normal-workflow/](https://cgc.sbgenomics.com/public/apps#pdxnet/pdx-wf-commit2/pdx-wes-cnv-xenome-tumor-normal-workflow/)).

297 **Low-pass whole-genome sequencing (WGS) data.** Whole-genome sequence reads from  
298 EuroPDX CRC liver metastasis and corresponding tumor grafts at different passages were  
299 mapped to the reference human genome (GRCh37) using Burrows-Wheeler Aligner<sup>24</sup> (BWA)  
300 v0.7.12. SAMTools<sup>28</sup> v0.1.18 was used to convert SAM files into BAM files and Picard v1.43 to  
301 remove PCR duplicates (<http://broadinstitute.github.io/picard/>). Raw copy number profiles for  
302 each sample were estimated by QDNAseq<sup>30</sup> R package v1.20 by dividing the human reference  
303 genome in non-overlapping 50 kb windows and counting the number of reads in each bin. Bins in  
304 problematic regions were removed<sup>31</sup>. Read counts were corrected for GC content and mappability  
305 by a LOESS regression, median-normalized and log<sub>2</sub>-transformed. Values below -1000 in each  
306 chromosome were floored to the first value greater than -1000 in the same chromosome. Raw

307  $\log_2$  ratio values were then segmented using the ASCAT<sup>22</sup> algorithm implemented in the ASCAT  
308 R package v2.0.7. Whole-genome sequence reads from EuroPDX BRCA tumors and  
309 corresponding tumor grafts at different passages were mapped to the reference human genome  
310 (GRCh38) and mouse genome (GRCm38/mm10, Ensembl 76) using Burrows-Wheeler Aligner  
311 (BWA) v0.7.15. Subsequently, mouse reads were excluded with Xenofilter<sup>32</sup>. Other processing  
312 steps are similar as described above. Raw copy number profiles were estimated for each sample  
313 by dividing the human reference genome in non-overlapping 20 kb windows and counting the  
314 number of reads in each bin. Only reads with at least mapping quality 37 were considered. Bins  
315 within problematic regions (i.e. multimapper regions) were excluded. Downstream analysis to  
316 estimate copy number was conducted as described above.

317 ***RNA-sequencing (RNA-Seq) and gene expression microarray (EXPARR) data.*** For SNU-JAX  
318 RNA-Seq data, Simultaneous read alignment was performed to both mouse (mm10) and human  
319 genome (GRCh38.p5) and only human specific reads were used for the expression quantification.  
320 Expression of mRNA was quantified as Transcripts Per Million (TPM) for downstream analysis  
321 using RNA-Seq by Expectation Maximization<sup>33</sup> (RSEM) with ensemble GTF reference  
322 GRCh38.92. Gene expression microarray data for SIBS HCC and normal liver samples from GEO  
323 and ArrayExpress databases were profiled as follows. After initial quality control and outlier  
324 removal, CEL files were normalized according to RMA algorithm and probesets were annotated  
325 according to Affymetrix annotation file for HG-U133 Plus 2, released on 2016-03-15 build 36. For  
326 expression-based copy number inference, we referred to the previous protocols for e-karyotyping  
327 and CGH-Explorer<sup>34-37</sup>. For each cancer type, expression values of tumor and corresponding  
328 normal samples were merged in a single table, and gene identifiers were annotated with  
329 chromosomal nucleotide positions. Genes located on sex chromosomes were excluded. Genes  
330 which values below 1 TPM (RNAseq) or probeset  $\log_2$ -values below 6 (microarray) in more than  
331 20% of the analyzed dataset were removed. Remaining gene expression values below the  
332 thresholds were respectively raised to 1 TPM or  $\log_2$ -value of 6. In the case of multiple transcripts  
333 (RNA-seq) or probesets (microarray) per gene, the one with the highest median value across the  
334 entire dataset was selected. According to the e-karyotyping protocol, the sum of squares of the  
335 expression values relative to their median expression across all samples was calculated for each  
336 gene, and 10% most highly variable genes were removed. For each gene, the median  $\log_2$   
337 expression value in normal samples was subtracted from the  $\log_2$  expression value in each tumor  
338 sample and subsequently input in CGH-explorer. For tumor-only datasets, the median  $\log_2$   
339 expression value in the same set of tumor samples was instead subtracted. The preprocessed  
340 expression profiles of each sample were individually analyzed using CGH-Explorer

341 (<http://heim.ifi.uio.no/bioinf/Projects/CGHEXplorer/>). CGH-PCF analysis was carried out to call  
342 copy number according to parameters previously reported<sup>38</sup>: least allowed deviation = 0.25; least  
343 allowed aberration size = 30; winsorize at quantile = 0.001; penalty = 12; threshold = 0.01.

344

### 345 **Filtering and gene annotation of copy number segments**

346 Copy number (CN) segments with  $\log_2$  copy number ratio estimated from the various platforms  
347 were processed in the following steps (Supplementary Fig. 26). Segments <1kb were filtered  
348 based on the definition of CNA<sup>39</sup>. In addition, SNP array segments had to be covered by >10  
349 probes, with an average probe density of 1 probe per 5kb. The copy number segments were then  
350 binned into 10kb windows to derive the median  $\log_2$ (CN ratio), which was subsequently used to  
351 re-center the copy number segments. Median-centered copy number segments were visualized  
352 using IGV<sup>40</sup> v2.4.13 and GenVisR<sup>41</sup> v1.16.1. Median-centered copy number of genes were  
353 calculated by intersecting the genome coordinates of copy number segments with the genome  
354 coordinates of genes (Ensembl Genes 93 for human genome assembly GRCh38, Ensembl  
355 Genes 96 for human genome assembly GRCh37). In the case where a gene overlaps multiple  
356 segments, the most conservative (lowest) estimate of copy number was used to represent the  
357 copy number of the entire intact gene.

358

### 359 **Comparison of CN gains and losses**

360 For the comparison of resolution, range of CN values and frequency of gains and losses between  
361 different platforms and analysis methods, we defined copy number gain or loss segments as –  
362 Gain:  $\log_2$ (CNratio) > 0.1; Loss:  $\log_2$ (CN ratio) < -0.1.

363

### 364 **Correlation of CNA profiles**

365 The overall workflow to compare CNA profiles is shown in Supplementary Fig. 26. PDX samples  
366 without passage information were omitted in the following downstream analysis. The copy number  
367 segments were binned into 10kb-windows or smaller using Bedtools<sup>42</sup> v2.26.0, and the variance  
368 of  $\log_2$ (CN ratio) and range (difference) of  $\log_2$ (CN ratio) between 5<sup>th</sup> to 95<sup>th</sup> percentile across all  
369 the bins were calculated as a measure of degree of aberration for each CNA profile. A non-  
370 aberrant profile results in a low variance or range. While variance can be biased for CNA profiles  
371 with small segments of extreme gains or losses, we preferred the use of 5<sup>th</sup> to 95<sup>th</sup> percentile  
372 range to identify samples with low degree of aberration, such that a narrow range indicates ≥90%  
373 of the genome has very low-level gains and losses. The similarity of two CNA profiles is quantified  
374 by the Pearson correlation coefficient of  $\log_2$ (CN ratio) of 100kb-windows binned from segments

375 or genes between 2 samples. Gene-based and segment-based (100kb windows) correlations  
376 were highly similar (data not shown). Using correlation avoided the issue of making copy number  
377 gain and loss calls based on thresholds, though it can be inconsistent due to different baseline  
378 and range in copy number values. Such variations are impacted by sample-specific variation in  
379 human stromal contamination or sensitivity copy number detection by different platforms.

380 **Comparison of CNA profiles between different platforms.** The copy number segments of each  
381 pair of data were intersected and binned into 100kb-windows or smaller using Bedtools. The  
382 Pearson correlation coefficient and linear regression model was calculated for the  $\log_2(\text{CN ratio})$   
383 of the windows. Windows with discrepant copy number were identified by outliers of the linear  
384 regression model defined by  $|\text{studentized residual}| > 3$ . These outlier windows were mapped to  
385 their corresponding segments to identify the size of CNA events that were discordant between  
386 the different copy number estimation methods. The proportion of the genome discordant CNA  
387 was calculated from the summation of the outlier windows.

388 **Identification of genes with CNA between different samples of the same model.** To compare  
389 the CNA profiles between different samples (PT or PDX) of the same model, the Pearson  
390 correlation coefficient and linear regression model was calculated for the  $\log_2(\text{CN ratio})$  of the  
391 genes for each pair of data. Prior to that, deleted genes with  $\log_2(\text{CN ratio}) < -3$  were rescaled to  
392  $-3$  to avoid large shifts in the correlation coefficient and linear regression model due to extremely  
393 negative values on the log scale. Extreme outliers of the linear regression model defined by  
394  $|\text{studentized residual}| > 3$  were removed to derive an improved linear regression model<sup>43</sup> not  
395 biased by few extreme values. Genes with copy number changes between the samples were  
396 identified by the difference in  $\log_2(\text{CN ratio})$  relative to the improved linear regression model of  
397  $|\text{standard residual}| < 0.5$ . We also removed some samples with low correlation due to sample  
398 mislabeling as they displayed high correlation with samples from other models. We also omit  
399 samples with low correlation values ( $< 0.6$ ) which resulted from non-aberrant CNA profiles in  
400 genomically stable tumors (5<sup>th</sup> to 95<sup>th</sup> percentile range  $< 0.3$ , Supplementary Fig. 64).

401 **Identification of aberrant sample pairs with highly discordant CNA profiles.** Aberrant CNA  
402 profiles were identified based on the 100kb-window copy number range (5th to 95th percentile)  
403  $> 0.5$ , for both samples. Sample pairs with Pearson correlation  $< 0.6$  were selected as highly  
404 discordant CNA profiles between them.

405

406 **Annotation with gene sets with known cancer or treatment-related functions**

407 Copy number altered genes ( $|\text{residual}| < 0.5$ ) were annotated by various gene sets with cancer  
408 or treatment-related functions gathered from various databases and publications (Supplementary  
409 Fig. 26):

- 410 1. Genes in 10 oncogenic signaling pathways curated by TCGA and were found to be frequently  
411 altered in different cancer types<sup>44</sup>.
- 412 2. Genes with gain in copy number or expression, or loss in copy number or expression that  
413 conferred therapeutic sensitivity, resistance or increase/decrease in drug response from the JAX  
414 Clinical Knowledgebase<sup>45,46</sup> (JAX-CKB) based on literature curation (<https://ckbhome.jax.org/>, as  
415 of 06-18-2019).
- 416 3. Genes with evidence of promoting oncogenic transformation by amplification or deletion from  
417 the Cancer Gene Census<sup>47</sup> (COSMIC v89).
- 418 4. Significantly amplified or deleted genes in TCGA cohorts of breast cancer<sup>48</sup>, colorectal cancer<sup>49</sup>,  
419 lung adenocarcinoma<sup>50</sup> and lung squamous cell carcinoma<sup>51</sup> by GISTIC analysis.

420

421 **Identification of genes with recurrent copy number changes**

422 Genes with a more stringent threshold of  $|\text{residual}| > 1.0$  with respect to the improved regression  
423 linear model (without discriminating gain or loss) were selected for each pairwise comparison  
424 between different samples of the same model. Pairwise cases in which genes are deleted in both  
425 samples ( $\log_2(\text{CN ratio}) \leq -3$ ) are omitted. Recurrent frequency for each gene across all models  
426 was calculated on a model basis such that genes with copy number between multiple pairs of the  
427 same model was counted as once. This avoided the bias towards models with many samples of  
428 similar copy number changes between the different pairs.

429

430 **Drug response analysis using CCLE data**

431 We developed a pipeline to evaluate gene copy number effects on drug sensitivity<sup>52,53</sup> by using  
432 the Cancer Cell Line Encyclopedia<sup>54,55</sup> (CCLE) cell line genomic and drug response data (CTRP  
433 v2). We downloaded the CCLE drug response data from Cancer Therapeutics Response Portal  
434 ([www.broadinstitute.org/ctrp](http://www.broadinstitute.org/ctrp)), and CCLE gene-level CNA and gene expression data from depMap  
435 data portal ('public\_19Q1\_gene\_cn.csv' and 'CCLE\_depMap\_19Q1\_TPM.csv',  
436 <https://depmap.org/portal/download/>). For CCLE drug response data, we used the area-under-  
437 concentration-response curve (AUC) sensitivity scores for each cancer cell line and each drug. In  
438 total, we collected gene-level  $\log_2$  copy number ratio data derived from the Affymetrix SNP 6.0  
439 platform from 668 pan-cancer CCLE cell lines, with a total of 545 cancer drugs tested. With the



440 CCLE gene-level CNA and AUC drug sensitivity scores, we performed gene-drug response  
441 association analyses for genes with recurrent copy number changes. Pearson correlation p-  
442 values between each gene's  $\log_2$  (CN ratio) and each drug's AUC score across all cell lines were  
443 calculated, and q-values were calculated by multiple testing Bonferroni correction. Significant  
444 gene-CNA and drug associations were kept (q-value < 0.1) to further evaluate gene-expression  
445 and drug response associations. If a gene's expression was also significantly correlated with AUC  
446 drug sensitivity scores, particularly in the same direction (either positively or negatively correlated)  
447 as the gene-CNA and drug association, that gene would be considered as significantly correlated  
448 with drug response based on both its CNA and gene expression.

449

### 450 **GISTIC analysis of WGS data**

451 To obtain perfectly matching and comparable PT–PDX cohorts, for GISTIC analysis, CRC trios in  
452 which at least one sample did not display significant CNAs were excluded from the analysis  
453 resulting in a total of 87 triplets. The GISTIC<sup>56</sup> algorithm (GISTIC 2 v6.15.28) was applied on the  
454 segmented profiles using the GISTIC GenePattern module (<https://cloud.genepattern.org/>), with  
455 default parameters and genome reference files Human\_Hg19.mat for EuroPDX CRC data and  
456 hg38.UCSC.add\_miR.160920.refgene.mat for EuroPDX BRCA data. For each dataset, GISTIC  
457 provides separate results (including segments, G-scores and FDR q-values) separately for  
458 recurrent amplifications and recurrent deletions. Deletion G-scores were assigned negative  
459 values for visualization. We observed that the G-Score range was systematically lower in PT  
460 cohorts, which is likely the result of the dilution of CNA by normal stromal DNA. In contrast, human  
461 stromal DNA in PDX samples were lower or negligible. To account for this difference in gene-  
462 level G-scores, PDXs at early and late passages were scaled with respect to PT gene-level G-  
463 score values using global linear regression, separately for amplification and deletion outputs.

464

### 465 **Gene set enrichment analysis (GSEA) of WGS data**

466 To assess the biological functions associated with the recurrent alterations detected by the  
467 GISTIC analysis, we performed GSEAPreranked analysis<sup>57,58</sup> on gene-level G-score  
468 profiles, for both amplifications and deletions. In particular, we applied the algorithm with 1000  
469 permutations on various gene set collections from the Molecular Signatures Database<sup>59,60</sup>  
470 (MSigDB): H (Hallmark), C2 (Curated : CGP chemical and genetic perturbations, CP canonical  
471 pathways), C5 (Gene Ontology: BP biological process, MF molecular function, CC cellular  
472 component) and C6 (Oncogenic Signatures) composed of 50, 4762, 5917 and 189 gene sets  
473 respectively. We also included gene sets with known cancer or treatment-related functions

474 described in an earlier section. We noted that multiple genes with contiguous chromosomal  
475 locations, typically in recurrent amplicons, generated spurious enrichment for gene sets which  
476 consists of multiple genes of adjacent positions, while very few or none of them had a significant  
477 GISTIC G-score. To avoid this confounding issue, we only considered the “leading edge genes”,  
478 i.e. those genes with increasing Normalized Enrichment Score (NES) up to its maximum value,  
479 that contribute to the GSEA significance for a given gene set. The leading-edge subset can be  
480 interpreted as the core that accounts for the gene set’s enrichment signal  
481 (<http://software.broadinstitute.org/gsea>). We included a requirement that the leading edge genes  
482 passing the GISTIC G-score significant thresholds based on GISTIC q-value 0.25 (Supplementary  
483 Table 8 and Fig. 73) make up at least 20% of the gene set. This 20% threshold was chosen as  
484 the minimal threshold at which gene sets assembled from TCGA-generated lists of genes with  
485 recurrent CNA in CRC or BRCA were identified as significant in GSEA (see Supplementary Table  
486 9). Finally, gene sets with a NES greater than 1.5 and a FDR q-value of less than 0.05, which  
487 passed the leading edge criteria, were considered significantly enriched in genes affected by  
488 recurrent CNAs.

489

## 490 REFERENCES

- 491 1. Krupke, D.M. *et al.* The Mouse Tumor Biology Database: A Comprehensive Resource  
492 for Mouse Models of Human Cancer. *Cancer Res* **77**, e67-e70 (2017).
- 493 2. Conte, N. *et al.* PDX Finder: A portal for patient-derived tumor xenograft model  
494 discovery. *Nucleic Acids Res* **47**, D1073-D1079 (2019).
- 495 3. Woo, X.Y. *et al.* Genomic data analysis workflows for tumors from patient-derived  
496 xenografts (PDXs): challenges and guidelines. *BMC Medical Genomics* **12**, 92 (2019).
- 497 4. DeRose, Y.S. *et al.* Patient-derived models of human breast cancer: protocols for in vitro  
498 and in vivo applications in tumor biology and translational medicine. *Curr Protoc*  
499 *Pharmacol* **Chapter 14**, Unit14 23 (2013).
- 500 5. DeRose, Y.S. *et al.* Tumor grafts derived from women with breast cancer authentically  
501 reflect tumor pathology, growth, metastasis and disease outcomes. *Nature Medicine* **17**,  
502 1514 (2011).
- 503 6. Zhang, X.M. *et al.* A renewable tissue resource of phenotypically stable, biologically and  
504 ethnically diverse, patient-derived human breast cancer xenograft models. *Cancer*  
505 *Research* **73**, 4885-4897 (2013).
- 506 7. Li, S. *et al.* Endocrine-therapy-resistant ESR1 variants revealed by genomic  
507 characterization of breast-cancer-derived xenografts. *Cell Rep* **4**, 1116-30 (2013).
- 508 8. Chen, Y. *et al.* Tumor characteristics associated with engraftment of patient-derived non-  
509 small cell lung cancer xenografts in immunocompromised mice. *Cancer* **0**(2019).
- 510 9. Ding, L. *et al.* Genome remodelling in a basal-like breast cancer metastasis and  
511 xenograft. *Nature* **464**, 999 (2010).
- 512 10. He, S. *et al.* PDXliver: a database of liver cancer patient derived xenograft mouse  
513 models. *BMC Cancer* **18**, 550 (2018).

- 514 11. Roth, R.B. *et al.* Gene expression analyses reveal molecular relationships among 20  
515 regions of the human CNS. *Neurogenetics* **7**, 67-80 (2006).
- 516 12. Huang, Y. *et al.* Identification of a two-layer regulatory network of proliferation-related  
517 microRNAs in hepatoma cells. *Nucleic Acids Research* **40**, 10478-10493 (2012).
- 518 13. Malouf, G.G. *et al.* Transcriptional profiling of pure fibrolamellar hepatocellular  
519 carcinoma reveals an endocrine signature. *Hepatology* **59**, 2228-2237 (2014).
- 520 14. Bertotti, A. *et al.* A Molecularly Annotated Platform of Patient-Derived Xenografts  
521 ("Xenopatients") Identifies HER2 as an Effective Therapeutic Target in Cetuximab-  
522 Resistant Colorectal Cancer. *Cancer Discovery* **1**, 508-523 (2011).
- 523 15. Galimi, F. *et al.* Genetic and expression analysis of MET, MACC1, and HGF in  
524 metastatic colorectal cancer: response to met inhibition in patient xenografts and  
525 pathologic correlations. *Clin Cancer Res* **17**, 3146-56 (2011).
- 526 16. Laird, P.W. *et al.* Simplified mammalian DNA isolation procedure. *Nucleic Acids Res* **19**,  
527 4293 (1991).
- 528 17. Schriml, L.M. *et al.* Human Disease Ontology 2018 update: classification, content and  
529 workflow expansion. *Nucleic Acids Research* **47**, D955-D962 (2018).
- 530 18. Lawrence, M.S. *et al.* Comprehensive genomic characterization of head and neck  
531 squamous cell carcinomas. *Nature* **517**, 576-582 (2015).
- 532 19. Lazar, A.J. *et al.* Comprehensive and Integrated Genomic Characterization of Adult Soft  
533 Tissue Sarcomas. *Cell* **171**, 950+ (2017).
- 534 20. Wang, K. *et al.* PennCNV: an integrated hidden Markov model designed for high-  
535 resolution copy number variation detection in whole-genome SNP genotyping data.  
536 *Genome Res* **17**, 1665-74 (2007).
- 537 21. International HapMap, C. The International HapMap Project. *Nature* **426**, 789-96 (2003).
- 538 22. Van Loo, P. *et al.* Allele-specific copy number analysis of tumors. *Proc Natl Acad Sci U*  
539 *S A* **107**, 16910-5 (2010).
- 540 23. Martin, M. Cutadapt removes adapter sequences from high-throughput sequencing reads.  
541 *2011* **17**, 3 (2011).
- 542 24. Li, H. & Durbin, R. Fast and accurate short read alignment with Burrows-Wheeler  
543 transform. *Bioinformatics* **25**, 1754-60 (2009).
- 544 25. Conway, T. *et al.* Xenome--a tool for classifying reads from xenograft samples.  
545 *Bioinformatics* **28**, i172-8 (2012).
- 546 26. McKenna, A. *et al.* The Genome Analysis Toolkit: a MapReduce framework for  
547 analyzing next-generation DNA sequencing data. *Genome Res* **20**, 1297-303 (2010).
- 548 27. DePristo, M.A. *et al.* A framework for variation discovery and genotyping using next-  
549 generation DNA sequencing data. *Nat Genet* **43**, 491-8 (2011).
- 550 28. Li, H. *et al.* The Sequence Alignment/Map format and SAMtools. *Bioinformatics* **25**,  
551 2078-9 (2009).
- 552 29. Favero, F. *et al.* Sequenza: allele-specific copy number and mutation profiles from tumor  
553 sequencing data. *Ann Oncol* **26**, 64-70 (2015).
- 554 30. Scheinin, I. *et al.* DNA copy number analysis of fresh and formalin-fixed specimens by  
555 shallow whole-genome sequencing with identification and exclusion of problematic  
556 regions in the genome assembly. *Genome research* **24**, 2022-2032 (2014).
- 557 31. Desmedt, C. *et al.* Uncovering the genomic heterogeneity of multifocal breast cancer.  
558 *Journal of Pathology* **236**, 457-466 (2015).

- 559 32. Kluin, R.J.C. *et al.* XenofilteR: computational deconvolution of mouse and human reads  
560 in tumor xenograft sequence data. *Bmc Bioinformatics* **19**(2018).
- 561 33. Li, B. & Dewey, C.N. RSEM: accurate transcript quantification from RNA-Seq data with  
562 or without a reference genome. *BMC Bioinformatics* **12**, 323 (2011).
- 563 34. Ben-David, U., Mayshar, Y. & Benvenisty, N. Virtual karyotyping of pluripotent stem  
564 cells on the basis of their global gene expression profiles. *Nature Protocols* **8**, 989  
565 (2013).
- 566 35. Weissbein, U., Schachter, M., Egli, D. & Benvenisty, N. Analysis of chromosomal  
567 aberrations and recombination by allelic bias in RNA-Seq. *Nat Commun* **7**, 12144 (2016).
- 568 36. Ben-David, U. *et al.* The landscape of chromosomal aberrations in breast cancer mouse  
569 models reveals driver-specific routes to tumorigenesis. *Nature Communications* **7**, 12160  
570 (2016).
- 571 37. Lingjaerde, O.C., Baumbusch, L.O., Liestol, K., Glad, I.K. & Borresen-Dale, A.L. CGH-  
572 Explorer: a program for analysis of array-CGH data. *Bioinformatics* **21**, 821-2 (2005).
- 573 38. Ben-David, U. *et al.* Patient-derived xenografts undergo mouse-specific tumor evolution.  
574 *Nature Genetics* **49**, 1567 (2017).
- 575 39. Redon, R. *et al.* Global variation in copy number in the human genome. *Nature* **444**, 444-  
576 454 (2006).
- 577 40. Thorvaldsdottir, H., Robinson, J.T. & Mesirov, J.P. Integrative Genomics Viewer (IGV):  
578 high-performance genomics data visualization and exploration. *Briefings in*  
579 *Bioinformatics* **14**, 178-192 (2013).
- 580 41. Skidmore, Z.L. *et al.* GenVisR: Genomic Visualizations in R. *Bioinformatics* **32**, 3012-  
581 3014 (2016).
- 582 42. Quinlan, A.R. & Hall, I.M. BEDTools: a flexible suite of utilities for comparing genomic  
583 features. *Bioinformatics* **26**, 841-842 (2010).
- 584 43. Motulsky, H.J. & Brown, R.E. Detecting outliers when fitting data with nonlinear  
585 regression – a new method based on robust nonlinear regression and the false discovery  
586 rate. *BMC Bioinformatics* **7**, 123 (2006).
- 587 44. Sanchez-Vega, F. *et al.* Oncogenic Signaling Pathways in The Cancer Genome Atlas.  
588 *Cell* **173**, 321-337.e10 (2018).
- 589 45. Patterson, S.E., Statz, C.M., Yin, T. & Mockus, S.M. Utility of the JAX Clinical  
590 Knowledgebase in capture and assessment of complex genomic cancer data. *npj*  
591 *Precision Oncology* **3**, 2 (2019).
- 592 46. Statz, C.M., Patterson, S.E., Yin, T. & Mockus, S.M. The JAX Clinical Knowledgebase:  
593 A Valuable Resource for Rapid Extraction of Cancer-Related Data. *Journal of Molecular*  
594 *Diagnostics* **18**, 1037-1038 (2016).
- 595 47. Sondka, Z. *et al.* The COSMIC Cancer Gene Census: describing genetic dysfunction  
596 across all human cancers. *Nature Reviews Cancer* **18**, 696-705 (2018).
- 597 48. The Cancer Genome Atlas, N. *et al.* Comprehensive molecular portraits of human breast  
598 tumours. *Nature* **490**, 61 (2012).
- 599 49. The Cancer Genome Atlas, N. *et al.* Comprehensive molecular characterization of human  
600 colon and rectal cancer. *Nature* **487**, 330 (2012).
- 601 50. The Cancer Genome Atlas Research, N. *et al.* Comprehensive molecular profiling of lung  
602 adenocarcinoma. *Nature* **511**, 543 (2014).
- 603 51. The Cancer Genome Atlas Research, N. *et al.* Comprehensive genomic characterization  
604 of squamous cell lung cancers. *Nature* **489**, 519 (2012).

- 605 52. Adams, D.J. *et al.* NAMPT Is the Cellular Target of STF-31-Like Small-Molecule  
606 Probes. *Acs Chemical Biology* **9**, 2247-2254 (2014).
- 607 53. Viswanathan, V.S. *et al.* Dependency of a therapy-resistant state of cancer cells on a lipid  
608 peroxidase pathway. *Nature* **547**, 453-+ (2017).
- 609 54. Barretina, J. *et al.* The Cancer Cell Line Encyclopedia enables predictive modelling of  
610 anticancer drug sensitivity. *Nature* **483**, 603 (2012).
- 611 55. Stransky, N. *et al.* Pharmacogenomic agreement between two cancer cell line data sets.  
612 *Nature* **528**, 84-+ (2015).
- 613 56. Mermel, C.H. *et al.* GISTIC2.0 facilitates sensitive and confident localization of the  
614 targets of focal somatic copy-number alteration in human cancers. *Genome Biology* **12**,  
615 R41 (2011).
- 616 57. Subramanian, A. *et al.* Gene set enrichment analysis: A knowledge-based approach for  
617 interpreting genome-wide expression profiles. *Proceedings of the National Academy of*  
618 *Sciences* **102**, 15545 (2005).
- 619 58. Mootha, V.K. *et al.* PGC-1 $\alpha$ -responsive genes involved in oxidative phosphorylation are  
620 coordinately downregulated in human diabetes. *Nature Genetics* **34**, 267-273 (2003).
- 621 59. Liberzon, A. *et al.* Molecular signatures database (MSigDB) 3.0. *Bioinformatics* **27**,  
622 1739-1740 (2011).
- 623 60. Liberzon, A. *et al.* The Molecular Signatures Database (MSigDB) hallmark gene set  
624 collection. *Cell Syst* **1**, 417-425 (2015).
- 625
